# Supplementary material
Source: publisher figshare collection journal article supplement (https://gsajournals.figshare.com/ndownloader/files/17818379)
Supplement: Supplementary file 1 [file 17818379]

## Sheet: All DE Genes from Fig 4B
Upregulated genes (Figure 4B)					Gene List from Venn Diagram								Downregulated genes (Figure 4B)						Gene List from Venn Diagram
	Raw Gene List				( number of DE genes in BOLD)									Raw Gene List					( number of DE genes in BOLD)
Fpr3	Fpr4	Fpr3 fpr4		89	13	62	31	74	36	145			Fpr3	Fpr4	Fpr3 fpr4		160	52	65	57	153	94	193
PHO11	PHO11	PHO11		ACC1	AVL9	COM2	ABF2	ACO1	ADO1	AAT2			FPR3	FPR4	FPR4		ABF1	AFT1	AGP2	ADE16	ACF4	ADE3	AAP1
TPO2	TPO2	TPO2		ADE4	COS6	CPR1	ARG5,6	AFG1	ALG12	ACB1			ARN2	TRM10	FPR3		ACA1	ATO3	AIM19	AFT2	ADE8	AME1	ABP1
TDA6	RTR1	TDA6		ADP1	GPD1	ECM3	ATG1	AIM29	AMN1	AIM36			OPY1	CTF8	BUB2		ACM1	CCW14	ARN1	AIM46	APA1	ASG1	ADE5,7
MZM1	TDA6	HSP30		AGX1	MFM1	GPH1	BIO2	ARC40	APT1	ALG5			TPP1	BLI1	ATG31		ADH5	CLN3	ARN2	APE1	APC1	ATS1	AEP1
HSP30	HSP30	YRO2		AHP1	PDR8	HAC1	DMA2	AVT5	BAR1	AQR1			FIT2	ATS1	KRE28		ADR1	CSI2	ASF2	APM2	APM1	AVT1	AKL1
PHO5	PHO5	RAD33		ALO1	PHM6	HIS1	GAT2	BGL2	CAF130	ARG1			ATG31	CSE4	MHT1		AGA1	DIA1	AZF1	APP1	ARC18	BMS1	APS1
YRO2	SPL2	SPL2		ALT2	RPL18A	HMF1	GCV1	BIG1	GCV3	ARO3			TEC1	CWC27	NNF1		ALD4	DIG2	BAT2	ATG15	ARG7	BNI4	ARC15
PHM6	YRO2	CBS1		AMD1	RPL28	HPF1	IZH4	CEP3	GLC3	ARO4			ACM1	KRE28	MTC3		ALD6	EFR3	BBC1	ATG31	ATG13	BOP3	ARK1
SPL2	RAD33	POF1		ANT1	SAM2	HSP30	LNP1	CNB1	GND1	ATG5			SNU66	SIW14	NTG1		ARA1	ENT2	BUD4	BEM3	ATP11	BTN2	ARP3
PHO12	PHM6	PET130		ARO1	SLS1	HXT3	MDH1	COX12	GPI1	ATX2			OSW7	IVY1	TEM1		AVT2	HFI1	CAF120	CCL1	BAT1	CDC37	ARP5
SPP381	POF1	INA22		ARO9	TDH1	HXT4	PEX31	COX13	GPP2	AXL1			IST3	IST3	SAE2		AXL2	HIF1	CCR4	CDC25	BFR1	CHS3	ASI2
POF1	MDM12	RIM9		ARX1	UBC9	MET22	PHM8	ELF1	GSY2	BMT2			FIT3	PCL10	LCL2		BEM1	IMP4	CHS1	CDC55	BLI1	CIS3	BCK2
MSS2	RRN10	HAP5		ATG18	UGA2	MIG2	PRY3	EMI2	HOM6	BOR1			KSS1	DIG2	ARN2		BRE5	IST3	CLG1	CMK2	BRR2	CLN2	BEM2
AGX1	MIM2	PHO5		ATP15		MKC7	RPL22A	ENO1	HOR7	BSC6			HAL1	MTC3	LPL1		BSC1	IVY1	CLN1	COA3	BRX1	CRH1	BUB2
MRPS8	MFM1	TAP42		ATP2		MPC2	RPL27A	ERG11	HXK1	CBS1			COS8	AIM19	COS8		BUD8	JSN1	CSG2	COS8	BSD2	CRP1	CBF2
MFM1	PHO12	NCA3		BAP3		NDE1	RPL41A	ERG26	IDH1	CDC10			NOP19	VBA1	YAP3		COQ5	KAR3	FAR1	CWP1	BUD27	DED1	CDC14
PHO89	MRPL23	YGP1		BUD17		OLE1	RPL41B	ERG4	IDH2	CIC1			IMP2	AME1	VPS75		CPA1	MAM3	FIT2	DMA1	CCT7	DPM1	CDC21
HMX1	GPH1	GPH1		CAM1		PHO11	RPL42A	FRE1	KSH1	COG7			IRC3	PSH1	SGO1		CPR4	MDG1	FIT3	ELG1	CFT1	DPS1	CDC28
TAP42	HXT4	TCD2		CAR1		PHO12	RPL9A	GAC1	MET10	COS7			HIF1	RCN1	PRP11		CPS1	MET4	GGA2	ENB1	CHS5	DRS1	CDC3
YAP7	PHO84	QCR10		CAR2		PHO5	RPP1A	GLK1	MRH1	COX5B			MPO1	ACF4	SCJ1		CTF3	MFA2	GLO3	FMP27	CHZ1	DUS3	CHD1
HXT4	PUT1	PHM8		CDC6		PHO8	RPS23A	HEM15	MSN4	CPA2			YFT2	FIT3	MPE1		CTS1	MOT2	GYL1	FPR3	COG2	DUS4	CLA4
HPF1	YGP1	MIG2		COR1		PHO81	SHM2	HYR1	NOG2	CTS1			DIG2	TFB3	DUS4		CWP2	MPP10	GYP7	GAS3	CPR7	ECM33	CLB1
DMA2	RAD30	IRC9		CTI6		PHO84	SNU114	IMO32	PGM2	DFG10			NRK1	SPO12	FCY1		DGR2	NAT1	HAL5	GEA2	CRN1	ELP4	CMP2
UTR4	MXR2	LDB18		CYC1		PHO86	SNU13	ISA1	PHB1	DIP5			TYW3	PKP2	AIM19		DNF3	NSA1	HHO1	GPA2	CSE4	FCY1	CNA1
MIG2	GPP2	SYC1		CYS3		PHO89	TAP42	KAE1	POR1	DLD3			ARN1	VPS71	ASI2		DOA4	NUP116	HSL1	GTT1	CSF1	FPR4	CNS1
SAS10	SPI1	PHO12		DBP2		PIC2	TCD2	LSP1	PRE9	DPH1			ACA1	COG2	ATS1		DPH5	OPT1	IMD2	HAL1	CTF8	FPS1	COQ1
PET112	CNB1	ARG5,6		DSE4		POF1	VMA10	MDH2	RAD33	DSE1			SIT1	RPF1	GEP5		DSE2	OTU1	IML1	HOS3	CTR86	GBP2	CTF18
PHO84	SNU56	HXT4		ERG9		PRR1	VPS15	MDM12	RBA50	DSE2			HOS3	KRI1	TIR1		DST1	PCL5	IRC20	ICY2	CWC27	GLN4	CTR9
VTC3	UBI4	IZH4		FAS1		PRS4	VTS1	MIM2	RGI1	EBS1			PCP1	RNA15	ASF2		DUF1	PHO87	KIC1	MAP2	DBP8	HEK2	CUE5
LEO1	PHO89	ULA1		FAS2		PST1	YEH1	MOB1	RPL7A	ELO1			PLC1	TIR1	YNG2		ECL1	PIN4	KSP1	MCD4	DPB2	HHT2	CYT1
NAT5	YPC1	SNU56		FCY21		RGS2	YOS9	MRPL23	RPP2B	ELP6			PHO4	HOF1	PGD1		EEB1	RDH54	KSS1	MCM6	DRE2	HIS7	DAM1
AVL9	AVL9	KRE29		GCN1		RPL14A		MSP1	RPS16A	EMG1			RTT109	MNT2	TIP41		EIS1	RGA2	LRG1	MDL1	EAR1	KRE28	DDR48
YOS9	VTC3	LNP1		GDH1		RPL21B		MXR2	TAL1	EMP70			AVT2	PGD1	RPC31		ERG3	RSC2	MNT2	MKS1	ECM16	KRE9	DEF1
CYC1	RRT8	NAS2		HGH1		RPL23A		NMA111	TPS1	ERP1			YPK3	NOP8	HAL1		ESL2	SCW4	MSB2	MPS1	ECM22	LSM4	DFG16
MSH1	ISA1	TTI2		HMX1		RPL23B		ORC5	TSL1	ERV14			APM2	ASF2	APS1		EXO5	SHS1	MTC5	MRL1	ECM32	MHP1	DNF1
BUD17	BIG1	NMD4		HPR1		RPL26B		OST2	YOP1	FCY2			INP2	SLD7	SNU66		FAB1	SIR4	NTE1	MRP13	ERP5	MNL1	DOT5
MAK3	KSH1	MED6		HRT3		RPL30		OST3		GAD1			KAR3	HIF1	APM2		FET3	SMF3	NUP1	MSB1	FPR2	MTC3	DOT6
TPO3	RGS2	PHO84		HSP150		RPL38		PEP4		GCN4			SIF2	SEC9	PHO4		FRE6	SOK1	NUP2	MSK1	GAL11	MYO1	DSK2
TPT1	SLS1	COX5B		HXT1		RPS13		PER33		GCV2			MDM36	SNG1	MDV1		FRE8	SPO14	PDR15	MVP1	GIS2	MYO5	DYN1
UBC9	PGM2	YEH1		ILV6		RPS17B		PFA4		GDH2			PHO87	PEX5	AEP1		FSH1	SPT21	PDR5	OAF1	GUT2	NCP1	ECM30
UGA2	UTR4	RHO2		KRE1		RPS21A		PHO13		GLO1			AGP2	SGO1	AZF1		FUS3	SPT23	PEX5	OPY1	HEM1	NDC80	ECT1
RGS2	MIG2	RPS9A		LCB1		RPS23B		PIS1		GRX2			MDG1	CLN1	SRB5		GDH2	SRB8	PIB2	PHD1	HHF1	NOB1	EDE1
SNU56	IMO32	KSH1		LEO1		RPS4A		PPH22		HAP4			TFB3	VTA1	MKS1		GIC2	SVL3	PKC1	PHO4	HIR2	NOP12	EHT1
COM2	COX12	NSE3		MAK3		RPS9A		PRP6		HAP5			VAM3	IES1	PIH1		GIS1	SWI4	PSR2	PPN1	HKR1	NPL3	EKI1
RRN5	GAC1	SPI1		MDN1		SNU56		PSK1		HIS5			APE1	SPT2	CDC21		GIS3	SYP1	PTR2	PRY2	HMG2	NST1	EMW1
LNP1	UBC9	DMA2		MIR1		SPI1		PSP1		HMT1			EEB1	BOP3	VPS28		GLN3	TAF3	RCR1	RGD2	HOF1	NUP57	ENT1
UFO1	UGA2	NTO1		MRPS8		SPL2		PST2		HOM3			RIB2	GUT2	BTN2		GPI18	TBF1	RPN12	RGR1	HSM3	OCH1	ERO1
RPS9A	HMF1	PIC2		MSH1		STP4		PUT1		HRI1			SIA1	PKC1	FMP30		GRC3	TFB3	RSC4	SBE2	IES1	PCL1	ERV46
PEX31	PDR8	COM2		MSS2		TDA6		RAD30		HSF1			HSV2	VPS4	SEC9		HLR1	TFG2	RTS3	SFH5	ILV3	PGD1	ESBP6
SLS1	HXK1	BMT2		MZM1		TEF1		RFS1		HTB1			HLR1	SPC110	GOT1		HOC1	TRS130	SCD6	SNT1	JIP5	PIM1	FMP30
HMF1	PFA4	INA17		NAT5		TEF2		RPL1A		INA1			TPO1	LOC1	MPS1		HSV2	VAN1	SEC28	SRS2	KRE33	PRP8	FRK1
PHM8	MOB1	YOS9		NOP1		TPO2		RPL1B		INA17			SGO1	LSM4	AIM46		HXT2	YME2	SGO1	SUR1	KRI1	PWP1	FSF1
STP4	MSP1	YCT1		PAT1		TPO3		RPL9B		INA22			AIM19	PET123	MRP13		ILV2		SIT1	SYN8	KRR1	RAT1	FTR1
HRT3	PIC2	RKM2		PDC1		TRX2		RPS0A		IRC9			GTT1	MTC1	GYL1		IMP2		SKN7	TPO1	LHP1	RET2	GAL83
CDC6	COM2	GPP2		PET112		UBI4		RPS14A		IRE1			ASF2	HSM3	HOS3		INP2		SLA1	ULS1	LOC1	RPB4	GCD11
GAT2	OST2	TYR1		PET9		URA1		RPS7A		IZH2			MSM1	URE2	DAM1		IRC3		SLY1	VID27	LYS2	RPF1	GCN2
ILV6	STE7	VTC3		PHO91		UTR4		RRN10		KRE29			CWP1	NDC80	SNG1		ISW1		SNU66	VPS74	MAD1	RRP5	GEA1
VTC4	PHO86	COS7		POL3		VTC1		RRT8		LDB18			PDR15	KSS1	LOT5		KNS1		SOK2		MAK21	RRT14	GEP5
HGH1	VBA2	ROG3		PRO3		VTC3		RTK1		LEU1			MDL1	RRT14	MFG1		KRE6		SPT6		MBF1	RUP1	GFD1
TCD2	TMA64	UTR4		PRP39		VTC4		RTR1		LEU4			CAF120	CTR86	MTC5		LDB19		SRL1		MCX1	RVB1	GOT1
YEH1	MET22	POS5		PUP2		YGP1		RTT10		LEU9			MKS1	SMC2	IMD2		LRE1		SUM1		MDN1	SCP160	GPB1
PHO8	GPI1	SKG1		RET2		YRO2		SER33		MED6			SAS4	VTI1	CNS1		MCK1		TEC1		MGE1	SDA1	GSC2
RPA14	COS6	CPA2		RPA14				SKP1		MET6			PHO85	RGP1	PCL1		MDM36		UPC2		MLP1	SEC23	GSF2
SSP120	RGI1	HMF1		RPA43				SSA1		MIC26			ELG1	BUD27	BOP3		MID2		VID30		MOT1	SEC31	HDA2
FCY21	VTC1	AIM36		RPP0				STE7		MIC27			RTS3	VID30	TOS4		MKT1		YMD8		MRD1	SEC7	HEM2
ARG5,6	AVT5	TPO3		RPS6B				TMA64		MNN1			SBE2	SUT1	SET5		MMS1				MRT4	SEC9	HOS4
VTC1	TSL1	COG7		RRD1				TPS3		MRPL35			PEX2	MAD1	AME1		MNT4				MTC1	SEG1	HSP60
SPI1	RPS9A	ARG1		RRN5				TRS120		MRPL6			RPH1	BTN2	NDC80		MOT3				MTR4	SHE10	HSP82
CTI6	CAF130	PEX31		RRP7				TRX1		MTL1			ADH5	HAL5	EKI1		MPO1				NCL1	SHE4	HUL5
PDR8	PST2	MRPL6		SAS10				TTI1		NAN1			GYL1	PSR1	LCB5		MPT5				NEW1	SIM1	IMH1
PIC2	VTC4	HIS1		SEC16				UBC7		NAS2			SWD1	MDG1	RPF1		MRPL7				NGG1	SIS1	INO80
RPL23A	RFS1	PHO89		SGM1				VBA2		NCA3			VID30	KAR3	RCR1		MSC1				NOC2	SKG3	IRR1
IZH4	CEP3	MPC2		SPP381				YKT6		NFU1			TRS130	VPS21	CLN1		MSM1				NOP15	SMC1	ITR1
GDH1	TRX2	RGS2		SSP120				YPC1		NGL1			AFT2	PDR15	SWE1		MSS4				NOP4	SNG1	IXR1
CAR2	TDH1	ODC2		STP22						NIP7			SYN8	RPB4	BBC1		MTH1				NOP6	SPC110	KAP95
VTS1	GSY2	ATG1		TAF5						NMD4			MTC5	DRS1	SIR3		MTM1				NOP8	SPT2	KAR2
YRA2	PRS4	GCV1		THR1						NSE3			GPA2	PSR2	DMA1		NAB6				NUG1	SPT5	KEL1
STP22	YKT6	HXK1		THR4						NTO1			MRL1	SEG1	CTF18		NCE102				NUM1	SRO9	KHA1
ADE4	RTK1	GCV3		TIF5						NYV1			GYP7	SPT21	FIT3		NET1				PCL10	SSC1	KIN1
BIO2	RPL23A	TOS3		TPT1						ODC2			SWI4	FCY1	PHD1		NGR1				PET123	STH1	KOG1
URH1	TPO3	BOR1		TUP1						OM14			ESL2	DPB2	LRG1		NOP19				PIF1	STI1	LAA1
ATG18	HPF1	MIC27		UFO1						OST6			RGA2	ATG13	PDR15		NPR1				PIN3	STU2	LCB5
PRS4	ELF1	PCL8		URH1						PCL8			ATG15	NSA1	CAF120		NRK1				PKH1	SWE1	LCL2
YGP1	TTI1	SLP1		YAP7						PDE2			PDC5	GYP7	SOL1		NTH1				PKP2	SWI6	LOT5
ATG1	AIM29	OM14		YHB1						PET130			CTF3	VPS64	MRL1		NUT1				PLB3	TIF4631	LPL1
PRR1	BAR1	PGM2		YPK9						PFF1			SPC97	MCX1	KSS1		OSW7				PMT5	TIR1	MDL2
GCV1	HYR1	NDE1		YPS3						PMP1			MET4	PIF1	CBF2		PAB1				PPQ1	TOM70	MDV1
ALT2	RBA50	ALG5		YRA2						PMP2			MOT3	ARG7	IXR1		PAN2				PRO2	TOR1	MFG1
SGM1	MPC2	ATX2		ZWF1						PMP3			SPT21	TRS130	RRT14		PBP1				PSH1	UBP3	MHT1
UBI4	ORC5	TOA2								POS5			HFI1	TFC8	GTT1		PCP1				PSR1	VPS27	MIT1
YPS3	ECM3	DFG10								PRC1			YPD1	HIR2	GYP7		PDC5				RAD1	VTI1	MPE1
VMA10	COX13	VTC1								PRE3			MPS1	NOB1	PHO2		PDE2				RBG1	WHI2	MRC1
ZWF1	PRR1	BSC6								PRS3			RAD52	SNU66	STB3		PDR3				RBK1	YCK1	MSC7
NDE1	KAE1	VTS1								QCR10			ICY2	NGG1	IMH1		PDS5				RCK2	ZUO1	MSN5
RRD1	PPH22	CAF130								RHO2			CCL1	SIR4	CDC3		PEX2				RCN1		NAP1
POL3	STP4	STP4								RIB5			MNT2	SNX41	MAP2		PFK2				RFC1		NNF1
HPR1	SKP1	RME1								RIM9			MRP13	DUS4	RER2		PGK1				RGP1		NPR3
MPC2	RPS17B	GPI1								RIO2			DGR2	ERP5	VTI1		PHO85				RLP7		NRP1
ATP15	PRP6	MRPL35								RKM2			SHS1	CHZ1	CCL1		PHO90				RNA15		NTG1
FAS2	GCV3	RPL39								RME1			IVY1	PCL1	ELG1		PLC1				RNH70		NUD1
CAR1	PHB1	PHO86								RNR4			MRPL7	ADE8	TOS2		POL5				RPB2		NUP159
GPH1	URA1	RGI1								ROG3			PCL5	RSA3	HOS4		PPS1				RPC53		PAL1
RPL41B	MRH1	APT1								RPL25			RGD2	YMD8	DOT5		PRM7				RPO21		PAN1
RRP7	PER33	ABF2								RPL37B			RPB10	TAF3	RBS1		PSY2				RPO41		PCL2
PRY3	UBC7	GCV2								RPL39			NSA1	RBK1	PEX5		PTP2				RPS27A		PCS60
TAF5	HOR7	ATG5								RPL40A			FRE8	IML1	SPC110		PUF2				RPS7B		PEX3
PHO91	TEF1	RPS23B								RPL40B			OTU1	SNF6	COA3		RAD51				RSA3		PGM1
ANT1	RPL30	NGL1								RPS10B			CSI2	DBP8	CDC28		RAD52				RSC8		PHO2
PHO81	RPS4A	ECM3								RPS18A			PEX5	ECM32	WHI2		RAX2				RVB2		PIH1
SNU114	IDH1	OLE1								RPS18B			LRE1	BSD2	TAM41		RBD2				SAC7		PMT1
PHO86	MSN4	NFU1								RPS1B			COA3	DRE2	POL32		RCN2				SAP190		PMT2
AHP1	PHO13	RPL41B								RPS27B			BUD8	PKH1	SPT2		REI1				SED5		POB3
HAC1	PST1	ELO1								RPS3			KIC1	OTU1	SAS3		RFC2				SFK1		POL32
PRP39	RPS13	UBI4								RPS31			IMD2	ATP11	ICY2		RGD1				SIW14		PRB1
TEF1	GLK1	NYV1								RPS6A			RAD51	YME2	PIB2		RHO3				SKT5		PRE2
YPK9	TEF2	VMA10								RPS9B			RDH54	PIB2	RTS3		RIB2				SLD7		PRP11
CYS3	ALG12	RRP4								RRP4			EXO5	TFG2	PCL2		RNQ1				SMC2		PRP43
RPL41A	APT1	RPL23A								RRP9			MNT4	VHT1	MSN5		ROM2				SNF6		PRY1
ARX1	RPS23B	IDH1								RVS161			CLN1	RSC4	KIC1		RPB10				SNX41		PTR3
RPS17B	PRE9	HPF1								SAM4			DOA4	RPC53	PTR3		RPH1				SOP4		PUB1
MIR1	SER33	WSC3								SAT4			MTH1	MTC5	SIT1		RSC1				SPB1		PUF4
HIS1	TRS120	MET22								SCW11			BBC1	RGA2	SHP1		RSC3				SPO12		PXL1
MET22	PHO8	TUM1								SEC4			RGR1	FPR2	RPL9B		RSM23				SSN2		RAX1
PUP2	SAM2	TRX2								SEC53			AIM46	SWI6	SEG1		RTS1				SSO1		RBS1
COS6	PSP1	MIC26								SKG1			MSC1	SKG3	GFD1		RTT109				STE6		RER2
MDH1	EMI2	BIO2								SKN1			COQ5	KIC1	RPL7B		SAS4				STP3		RHO5
NOP1	RPS14A	VHS1								SLP1			YME2	SMC1	MSB1		SBE22				STT4		RPC31
RPS13	HOM6	RBA50								SPE3			TAF3	RDH54	CLB1		SCW10				SUA5		RPL7B
HSP150	HIS1	PRE3								STE2			ENB1	TEC1	HDA2		SCW11				SUT1		RPL8A
PRO3	NDE1	HRI1								SYC1			PIB2	GYL1	PEX3		SEC15				SYT1		RPL9B
VPS15	LSP1	GAD1								TMN3			PTR2	HFI1	SEC20		SEN1				TFC8		RPN1
SEC16	RPL18A	TEF1								TOA2			RHO3	NOP6	SET2		SER1				TIP1		RPS14B
ECM3	ERG26	PRR1								TOS3			GIS1	ATO3	SPT7		SET1				TOS1		RSC6
RPP1A	PHO81	VTC4								TRM732			IML1	SSN2	OPY1		SIA1				TRM10		RTT107
MKC7	RPL14A	CTS1								TTI2			BAT2	SED5	RHO5		SIF2				TRM3		RVS167
SAM2	RPS21A	TMN3								TUM1			PSR2	ARC18	AFT2		SKY1				URE2		SAE2
TUP1	GPD1	VID24								TYR1			SET1	ARN2	SWT1		SLT2				UTP4		SAS3
RPS4A	FRE1	RIB5								UFD4			SKN7	BRR2	SYN8		SNQ2				UTP7		SBA1
PDC1	MET10	SNU114								ULA1			GLN3	NOP15	YCG1		SPC97				VAM6		SCD5
SHM2	AFG1	MDH1								VHS1			IMP4	NTE1	VAC17		SPC98				VBA1		SCJ1
PET9	GLC3	MSN4								VID24			MSK1	CSI2	SRS2		SPG5				VBA4		SDS23
KRE1	RPL9B	DPH1								VMA5			MMS1	RUP1	URA8		SPO24				VHT1		SEC16
ACC1	YOP1	MRH1								WBP1			RSC3	RTS3	FPS1		STD1				VNX1		SEC20
DSE4	PSK1	PST1								WSC3			SYP1	RNH70	PSR2		STE12				VPS17		SEC3
ALO1	RPL1B	GSY2								YCT1			KNS1	PMT5	LSM4		SUN4				VPS21		SEH1
LCB1	OLE1	MET10											KSP1	MPP10	CLA4		SWD1				VPS4		SET2
RPL18A	RPL26B	PRS4											DMA1	CPR7	NUD1		TNA1				VPS64		SET5
RPA43	MKC7	AQR1											PKC1	IMD2	NAP1		TOR2				VPS71		SFL1
RPL9A	CPR1	OST6											SOK2	CAF120	IRR1		TPP1				VRG4		SHP1
TRX2	HXT3	GAT2											EIS1	IMP4	PAN1		TPS2				VTA1		SIN3
FAS1	TRX1	HOR7											DNF3	SPT5	SWI5		TRM5				WHI3		SIR3
RPL14A	ACO1	ELP6											HHO1	DIA1	PAL1		TYW3				WSC2		SLA2
GPD1	RPL38	NIP7											CDC55	NOP4	TRK1		UBP13				YCK2		SLG1
PST1	TAL1	RRP9											RSM23	PLB3	PRY1		VAM3						SOD2
ATP2	ERG11	HSF1											TFG2	RFC1	VPS33		VMR1						SOL1
RPL22A	TPS1	MTL1											MTM1	FIT2	NPR3		VPS53						SPT7
RPP0	ARC40	RPL41A											ABF1	VAM6	GAL83		YFT2						SRB5
THR1	POR1	CDC10											PHD1	PHO87	UBP3		YIP3						SRP40
ARO9	NOG2	RVS161											LRG1	SWE1	SLA1		YPD1						SSD1
RPL23B	TPS3	PRY3											SLY1	FAR1	ARK1		YPK3						SSK2
TEF2	RTT10	RPL38											UPC2	SWI4	NTE1								STB3
ABF2	PEP4	IRE1											ADR1	PIN4	YMD8								SWI5
RPL21B	MDH2	DSE1											SIR4	AGP2	SOK2								SWT1
CAM1	SSA1	HMT1											SRS2	APM1	MNT2								TAH11
TIF5	RPL7A	LEU4											RFC2	SYT1	CDC55								TAM41
RPS23B	BGL2	IZH2											FUS3	MRD1	PTR2								TDH2
RPL28	RPP2B	SCW11											REI1	SHE4	YIA6								TEM1
OLE1	ADO1	HIS5											SPC98	SHS1	ENT1								THR1
RPS23A	GND1	SAT4											NAB6	UPC2	KIN1								TIP41
BAP3	HAC1	EMG1											MVP1	ENT2	RPB4								TOP2
CPR1	RPL23B	CIC1											SPG5	RSC2	MHP1								TOS2
HXT3	AMN1	DSE2											MSB1	MNL1	NUP2								TOS4
ADP1	NMA111	STE2											AFT1	SIT1	SMC1								TRE2
PAT1	RPS16A	GLC3											DST1	HEK2	VPS27								TRK1
MDN1	RPL1A	MNN1											RSC1	BNI4	POB3								TRM112
RPL38	RPL21B	VPS15											SPO14	VPS27	SPT5								UBP10
HXT1	PIS1	AMN1											GDH2	PPQ1	DSK2								URA8
RET2	OST3	RIO2											GIC2	SCD6	ELP4								UTP14
COR1	RPS7A	RPL42A											VPS74	PIN3	YTA6								UTP5
RPS6B	IDH2	TSL1											ATO3	WHI2	CUE5								VAC17
AMD1	HEM15	AXL1											HAL5	AZF1	CYT1								VMA16
URA1	RPL28	SKN1											VPS53	VPS17	RAX1								VPS1
RPS21A	ERG4	UFD4											IRC20	SUA5	VID30								VPS28
ARO1	RPS0A	GDH2											MAP2	SPO14	CLG1								VPS33
THR4	ENO1	MKC7											PIN4	UTP4	ECT1								VPS75
TDH1		PHO8											GPI18	KRR1	ARC15								XRN1
RPL27A		PMP1											RGD1	STU2	MRC1								YAP3
ERG9		SHM2											NPR1	ECM22	FAR1								YCG1
SNU13		PRS3											YMD8	IRC20	KHA1								YIA6
RPL42A		SEC53											PDS5	DUS3	STU2								YNG2
DBP2		PMP2											BEM3	UTP7	IRC20								YOR1
GCN1		GCN4											MAM3	UBP3	HSP60								YPS1
RPL30		FCY2											ECL1	SKT5	DUS3								YTA6
RPL26B		MET6											MSS4	TIP1	DOT6
YHB1		NOG2											PPN1	HIS7	AGP2
		RPS18B											RNQ1	TBF1	ESBP6
		RPS6A											PHO90	HHO1	SSK2
		SPE3											SFH5	MAM3	FRK1
		PDE2											GRC3	NOP12	HHO1
		RPL9A											RSC2	CLN3	SLG1
		ERV14											ROM2	ASG1	SHE4
		ACB1											TRM5	STH1	RUP1
		PHB1											STE12	LRG1	SCD5
		PHO81											RPN12	LHP1	HSL1
		RPS21A											MOT2	SLY1	RSC4
		BAR1											RCR1	CFT1	PRY2
		ARO3											BEM1	SPB1	PXL1
		RPS13											VID27	AVT1	SBE2
		EBS1											YIP3	BUD4	PPN1
		GRX2											AGA1	BAT2	RSC6
		GND1											FET3	FPS1	ATG15
		HAC1											GAS3	PCL5	RPS14B
		SEC4											SPO24	CRP1	BUD4
		RPL23B											AZF1	MOT2	SWI6
		ALG12											RCN2	MET4	RTT107
		RPS1B											CPA1	ELP4	HEK2
		SAM4											OAF1	RAD1	COQ1
		DIP5											SPT23	JIP5	BNI4
		LEU9											NTH1	AFT1	MVP1
		IDH2											SOK1	SOK1	MDL2
		RPL30											SUM1	SUM1	DFG16
		RPL26B											FAR1	GBP2	SFL1
		PRE9											SMF3	CIS3	HUL5
		RPL40B											GIS3	BBC1	MCD4
		RPP1A											VMR1	SMF3	APE1
		CPR1											SLT2	ARN1	SRP40
		HTB1											GLO3	KSP1	ITR1
		PMP3											PPS1	YCK1	HAL5
		HXT3											PSY2	RSC8	CNA1
		RPS17B											VAN1	SLA1	ARN1
		RPL37B											RBD2	WHI3	SOD2
		HOM6											TBF1	TOM70	KSP1
		RPS4A											SUR1	EAR1	YCK1
		AAT2											DUF1	BMS1	CDC14
		EMP70											STD1	RBG1	RET2
		TAL1											LDB19	OCH1	PRB1
		RPS27B											PDE2	NUP57	AKL1
		WBP1											MCM6	SDA1	HIS7
		HOM3											RSC4	HSL1	ARP5
		TPS1											AXL2	SFK1	HSP82
		ARO4											SNT1	MRT4	CMK2
		POR1											CPR4	CDC37	GPB1
		GLO1											SRB8	SAC7	SDS23
		TRM732											MPP10	HKR1	NUP57
		ERP1											HOC1	SRB8	SBA1
		RPL7A											ENT2	MTR4	STH1
		LEU1											FSH1	PWP1	SEC31
		RNR4											PDR3	NUP2	UPC2
		URA1											NGR1	STP3	SFH5
		HAP4											MFA2	CCW14	IML1
		VMA5											APP1	MYO1	DRS1
		RPL14A											DIA1	SKN7	SKG3
		RPL40A											ULS1	RPN12	MDL1
		RPP2B											PTP2	RCR1	PWP1
		RPS18A											ALD4	APC1	CRP1
		ADO1											SEC15	MFA2	RGD2
		RPL22A											CLG1	SSO1	GPA2
		RPS31											NUT1	GAL11	TEC1
		INA1											TOR2	NOC2	VID27
		RPL27A											MCD4	SHE10	CHS1
		DLD3											PRM7	CLG1	TRM112
		SNU13											BSC1	MSB2	UTP14
		PFF1											OPT1	SPT23	CMP2
		TEF2											FRE6	RPO21	SCD6
		RPS9B											ADE16	RVB1	ULS1
		RPS3											DPH5	SRO9	OAF1
		RPS16A											CTS1	SYP1	MSB2
		RPS10B											CDC25	OPT1	RVB1
		PRC1											UBP13	SOP4	GCN2
		NAN1											SLA1	SCP160	VPS74
		RPL21B											CSG2	SSC1	GBP2
		YOP1											ISW1	DPS1	LAA1
		RPL25											NUP116	CSF1	CIS3
		RPS23A											EFR3	PRP8	SCP160
													SKY1	GLO3	GEA1
													SCW10	CSG2	SSC1
													SVL3	GIS2	SEC3
													PUF2	YCK2	GLO3
													NUP1	HHT2	PKC1
													PAN2	SIS1	PCS60
													SCW11	RLP7	EMW1
													SCW4	VAN1	ERO1
													SEC28	SOK2	BEM3
													TPS2	NUP116	RAT1
													BUD4	EFR3	NOB1
													SBE22	CLN2	TRE2
													FAB1	SVL3	FSF1
													ARA1	BRX1	MCM6
													CHS1	RAT1	OCH1
													MKT1	NUP1	CRH1
													SUN4	PRO2	PGM1
													HXT2	CRH1	CWP1
													ALD6	RPS27A	RVS167
													SCD6	SAP190	ABP1
													KRE6	HEM1	AVT1
													NAT1	NPL3	TAH11
													JSN1	KRE9	BAT2
													RAX2	CCT7	TPO1
													POL5	TOR1	MYO1
													MCK1	RCK2	VMA16
													BRE5	CHS5	GGA2
													NTE1	BAT1	MNL1
													PFK2	RPO41	GEA2
													CMK2	NUG1	BCK2
													CLN3	NCL1	UBP10
													CCR4	VNX1	APP1
													PBP1	CHS1	MSK1
													HSL1	NST1	DDR48
													CWP2	ECM16	FIT2
													PRY2	RVB2	SHE10
													SNQ2	NEW1	SEH1
													PGK1	DPM1	GSC2
													CPS1	MGE1	SPT6
													NET1	SRL1	DYN1
													ERG3	SPT6	NUP159
													MID2	ADE3	NRP1
													NUP2	STE6	SUM1
													CCW14	NAT1	TDH2
													SEN1	SEC7	ARP3
													FMP27	APA1	ADE16
													GGA2	ILV3	RGR1
													DSE2	JSN1	KAP95
													GEA2	MDN1	ECM30
													PAB1	STT4	RPL8A
													ILV2	RET2	MSC7
													NCE102	PIM1	KEL1
													RTS1	HHF1	KOG1
													PDR5	CHS3	EDE1
													SER1	LYS2	CHS3
													SRL1	TOS1	CSG2
													MPT5	WSC2	EHT1
													MSB2	RPS7B	TOM70
													SPT6	RRP5	SIS1
													TNA1	MOT1	CLN2
														SEC23	BMS1
														RPB2	ENB1
														BFR1	CTR9
														MBF1	NOP12
														CCR4	PMT2
														SCW4	XRN1
														ZUO1	PRP43
														PTR2	HEM2
														MLP1	SDA1
														SIM1	ASG1
														SEC28	PMT1
														SEC31	CDC37
														TRM3	SLY1
														MAK21	UTP5
														VBA4	SNT1
														NUM1	KRE9
														MHP1	SKN7
														CRN1	RPN12
														HMG2	MIT1
														NCP1	CHD1
														GGA2	DNF1
														ECM33	ECM33
														KRE33	SLA2
														MYO5	NST1
														STI1	MYO5
														PDR5	GAS3
														GLN4	PRE2
														DED1	STI1
														VRG4	PDR5
														TIF4631	ADE5,7
															ADE3
															DEF1
															VPS1
															SEC7
															SSD1
															SRO9
															DPS1
															YPS1
															CDC25
															RPN1
															AAP1
															PRP8
															FTR1
															BEM2
															PIM1
															HHT2
															RRP5
															SUR1
															SEC23
															NUP1
															CCR4
															INO80
															ZUO1
															SIM1
															SEC28
															NPL3
															KAR2
															TOR1
															FMP27
															THR1
															NCP1
															GCD11
															TOP2
															PUB1
															GSF2
															SEC16
															DPM1
															SIN3
															GLN4
															DED1
															SRL1
															ERV46
															PUF4
															TIF4631
															YOR1

## Sheet: GO fpr3 (337 DE genes)
Genes Entered to Funspec: 337 (89+31+160+57 from Figure 4B)
Input Cluster (n=325)
Genes Not Found:
APE1
ARG5%2C6
ATG31
DUF1
ESL2
LNP1
MPO1
NOP19
OSW7
SPO24
TCD2
YFT2
GO Molecular Function
Category	p-value	In Category from Cluster	k	f
transferase activity [GO:0016740]	2.11073e-07	FUS3 GPI18 YPK3 VPS15 PGK1 NOP1 MPS1 POL3 GCV1 ALT2 ARO1 MSS4 POL5 AGX1 FAB1 TYW3 ATG1 BIO2 THR1 SLT2 TRM5 SET1 ARO9 ERG9 GTT1 HOC1 MCD4 FAS1 TOR2 RTT109 KNS1 GRC3 ADE16 PDC1 SHM2 PDC5 DPH5 CAR2 COQ5 ILV2 PFK2 GAS3 SKY1 LCB1 ADE4 NRK1 NPR1 MCK1 BUD17 MNT4 CMK2 TPT1 SER1 NAT5 PHO85 SUR1 EEB1 FAS2 MAK3	59	611
catalytic activity [GO:0003824]	9.65068e-05	CYS3 COR1 ADH5 THR4 GDH2 NTH1 TPS2 ALT2 ARO1 PRO3 PHM8 AGX1 SCW11 BIO2 ARO9 ERG9 MDH1 MCD4 FAS1 ADE16 PDC1 SHM2 PDC5 CTS1 CAR2 ALO1 ILV2 DNF3 PFK2 GAS3 LCB1 SCW10 ZWF1 ACC1 RIB2 SER1 YPK9 CPA1 PDE2 GDH1 FAS2	41	455
glucosidase activity [GO:0015926]	0.000179206	DSE2 SCW10 SUN4 KRE6	4	7
pyridoxal phosphate binding [GO:0030170]	0.000193751	CYS3 THR4 ALT2 AGX1 ARO9 SHM2 CAR2 LCB1 SER1	9	43
hydrolase activity [GO:0016787]	0.000194662	UBP13 MAP2 EXO5 ISW1 PPS1 ATG15 POL3 NTH1 DOA4 TPS2 ARX1 IRC3 URH1 PPN1 PHM8 SCW11 PAN2 MCM6 PCP1 PUP2 FSH1 SRS2 CPS1 ATP2 FAS1 YEH1 ADE16 YPS3 CTS1 SEN1 AMD1 IMP2 TPP1 DNF3 SCW10 DBP2 DSE4 RIB2 SIA1 ULS1 PTP2 YPK9 PDE2 EEB1 CAR1 HOS3 RBD2 PLC1 ATP15	49	596
transaminase activity [GO:0008483]	0.000213471	GCV1 ALT2 AGX1 ARO9 CAR2 SER1	6	19
nucleotide binding [GO:0000166]	0.000371676	FUS3 PET112 YPK3 VPS15 NGR1 ISW1 ADP1 PGK1 MPS1 POL3 SNQ2 ARO1 MSS4 IRC3 POL5 GPA2 RAD51 PAB1 FAB1 RSM23 ATG1 MCM6 MSM1 VMR1 THR1 SLT2 MSH1 RHO3 SRS2 CDC6 RFC2 ATP2 SNU114 TOR2 YRA2 KNS1 GRC3 MDN1 MDL1 SEN1 NAB6 DNF3 PFK2 SKY1 MSK1 DBP2 NRK1 NPR1 MCK1 ACC1 BUD17 CMK2 ULS1 YPK9 CPA1 VTS1 PHO85 TIF5 PUF2	59	778
kinase activity [GO:0016301]	0.000464239	FUS3 YPK3 VPS15 PGK1 MPS1 ARO1 MSS4 FAB1 ATG1 THR1 SLT2 TOR2 KNS1 GRC3 PFK2 SKY1 NRK1 NPR1 MCK1 BUD17 CMK2 PHO85	22	206
structural constituent of cell wall [GO:0005199]	0.000780282	HSP150 CWP1 CWP2 YPS3 KRE1	5	16
protein phosphatase type 2A regulator activity [GO:0008601]	0.00109715	CDC55 RRD1 RTS1	3	5
Rho GTPase activator activity [GO:0005100]	0.00144328	RGD1 GIC2 RGD2 BEM3	4	11
ATP binding [GO:0005524]	0.00170497	FUS3 PET112 YPK3 VPS15 ISW1 ADP1 PGK1 MPS1 SNQ2 ARO1 MSS4 IRC3 RAD51 FAB1 RSM23 ATG1 MCM6 MSM1 VMR1 THR1 SLT2 MSH1 SRS2 CDC6 RFC2 ATP2 TOR2 KNS1 GRC3 MDN1 MDL1 SEN1 DNF3 PFK2 SKY1 MSK1 DBP2 NRK1 NPR1 MCK1 ACC1 BUD17 CMK2 ULS1 YPK9 CPA1 PHO85	47	622
phosphatidylinositol phosphate kinase activity [GO:0016307]	0.00241553	MSS4 FAB1	2	2
acetolactate synthase activity [GO:0003984]	0.00241553	ILV6 ILV2	2	2
phosphate transmembrane transporter activity [GO:0015114]	0.00241553	PHO90 PHO91	2	2
fatty-acyl-CoA synthase activity [GO:0004321]	0.00241553	FAS1 FAS2	2	2
DNA-dependent ATPase activity [GO:0008094]	0.0024631	RSC3 RAD51 RSC1 MSH1 SEN1 ULS1	6	29
thiamine pyrophosphate binding [GO:0030976]	0.00549854	PDC1 PDC5 ILV2	3	8
metal ion binding [GO:0046872]	0.00620404	OAF1 PDR3 COR1 MAP2 ADH5 REI1 POL3 GIS1 ARX1 ARO1 ADR1 RSC3 PPN1 GLN3 RPH1 FAB1 DST1 YHB1 BIO2 DMA1 CPS1 PEX2 CYC1 ABF1 FRE6 PDC1 PDC5 HMX1 AMD1 FET3 MOT3 ILV2 GAT2 ADE4 DMA2 NRK1 ACC1 BUD17 RIB2 IZH4 ULS1 RPB10 YPK9 PDE2 CAR1 CTI6	46	647
phosphatidylinositol-3-phosphate binding [GO:0032266]	0.00659032	BEM1 RGD1 FAB1 MVP1 BEM3	5	25
protein serine/threonine kinase activity [GO:0004674]	0.00673343	FUS3 YPK3 VPS15 MPS1 ATG1 SLT2 TOR2 KNS1 SKY1 NPR1 MCK1 CMK2 PHO85	13	122
fatty acid synthase activity [GO:0004312]	0.00701018	FAS1 FAS2	2	3
recombinase activity [GO:0000150]	0.00701018	RAD51 RAD52	2	3
histone demethylase activity (H3-K36 specific) [GO:0051864]	0.00701018	GIS1 RPH1	2	3
protein serine/threonine/tyrosine kinase activity [GO:0004712]	0.00701018	MPS1 MCK1	2	3
calcium ion binding [GO:0005509]	0.00923965	NTH1 AXL2 SSP120 CAM1 PLC1	5	27
GO Biological Process
Category	p-value	In Category from Cluster	k	f
metabolic process [GO:0008152]	1.98777e-05	ADH5 ILV6 THR4 GDH2 NTH1 TPS2 ARO1 URH1 PRO3 PHM8 AGX1 SCW11 BIO2 ERG9 CPS1 MDH1 MCD4 FAS1 ADE16 PDC1 PDC5 DPH5 CTS1 CAR2 DNF3 PFK2 ADE4 SCW10 NRK1 ZWF1 ACC1 DSE4 SER1 NAT5 YPK9 PDE2 ALD4 GDH1 ALD6 FAS2 MAK3	41	425
signal transduction [GO:0007165]	4.63611e-05	RGD1 MTH1 GPA2 RGD2 CDC55 SLT2 TOR2 CMK2 RTS1 STD1 PDE2 BEM3 PLC1	13	73
cellular cell wall organization [GO:0007047]	0.000370777	SBE2 HLR1 SCW11 SBE22 DSE2 HSP150 MCD4 CTS1 GAS3 SCW10 SUN4 KRE1 KRE6	13	89
ATP transport [GO:0015867]	0.000455486	PET9 MCD4 ANT1	3	4
phosphorylation [GO:0016310]	0.000464239	FUS3 YPK3 VPS15 PGK1 MPS1 ARO1 MSS4 FAB1 ATG1 THR1 SLT2 TOR2 KNS1 GRC3 PFK2 SKY1 NRK1 NPR1 MCK1 BUD17 CMK2 PHO85	22	206
negative regulation of transposition, RNA-mediated [GO:0010526]	0.000596174	FUS3 RTT109 ELG1 MMS1	4	9
cytokinesis, completion of separation [GO:0007109]	0.00144328	SCW11 DSE2 CTS1 DSE4	4	11
snoRNA processing [GO:0043144]	0.00241553	NOP1 SEN1	2	2
regulation of transcription, DNA-dependent [GO:0006355]	0.00314157	OAF1 SWD1 PDR3 SIF2 TAF5 ISW1 SNT1 TUP1 GIS1 HPR1 SAS4 ADR1 RSC3 GLN3 ACA1 RPH1 PHO4 DST1 NUT1 RSC1 STE12 PHD1 ABF1 RTT109 RGR1 MDN1 RRN5 MOT3 GAT2 MKS1 YAP7 STD1 LEO1 ULS1 HOS3 CTI6 AFT2 ACM1 CCL1	39	507
glucose transport [GO:0015758]	0.00356579	MTH1 HXT1 HXT2	3	7
NADPH regeneration [GO:0006740]	0.00356579	ZWF1 ALD4 ALD6	3	7
fungal-type cell wall organization [GO:0031505]	0.00395884	LRE1 SBE2 HLR1 MPT5 SLT2 SBE22 HSP150 CWP1 CWP2 YPS3 MID2 KRE1 PHO85 KRE6	14	128
intracellular signal transduction [GO:0035556]	0.00510487	RGD2 GIS3 ROM2 PLC1	4	15
phosphatidylinositol phosphorylation [GO:0046854]	0.00549854	MSS4 FAB1 TOR2	3	8
pyruvate metabolic process [GO:0006090]	0.00549854	PDC1 PDC5 ALD4	3	8
vacuolar protein processing [GO:0006624]	0.00701018	ATG15 ATG18	2	3
negative regulation of translational initiation [GO:0045947]	0.00701018	PAT1 TIF5	2	3
NAD biosynthesis via nicotinamide riboside salvage pathway [GO:0034356]	0.00701018	URH1 NRK1	2	3
acetate biosynthetic process [GO:0019413]	0.00701018	ALD4 ALD6	2	3
positive regulation of stress-activated MAPK cascade [GO:0032874]	0.00701018	SIF2 SNT1	2	3
meiotic joint molecule formation [GO:0000709]	0.00701018	RAD51 RAD52	2	3
response to acid [GO:0001101]	0.00794973	RGD1 SLT2 MID2	3	9
nucleosome positioning [GO:0016584]	0.00794973	ISW1 TUP1 RSC3	3	9
regulation of transcription from RNA polymerase II promoter in response to stress [GO:0043618]	0.00794973	SET1 RRD1 RTT109	3	9
positive regulation of transcription from RNA polymerase II promoter [GO:0045944]	0.0097269	PDR3 ISW1 GIS1 GLN3 PHO4 PHD1 ABF1 YAP7 CAM1 HOS3 HAL1	11	100
GO Cellular Component
Category	p-value	In Category from Cluster	k	f
cell wall [GO:0005618]	2.10677e-05	SCW11 DSE2 PRY3 HSP150 CWP1 CWP2 CTS1 GAS3 SCW10 SUN4 KRE1 AGA1 DSE4	13	68
fungal-type cell wall [GO:0009277]	5.85961e-05	SCW11 DSE2 PRY3 HSP150 CWP1 CWP2 MCD4 CTS1 GAS3 SCW10 SUN4 KRE1 AGA1 DSE4	14	85
cytoplasm [GO:0005737]	6.26075e-05	CYS3 PDR3 FUS3 MAP2 YPK3 OPY1 ADH5 ARA1 RPS6B BEM1 NGR1 RGD1 REI1 STP22 RNQ1 ADP1 PGK1 THR4 PAT1 RPP1A RPL41B RPL41A YPD1 NTH1 GCV1 DOA4 TPS2 ARX1 ALT2 ARO1 GIC2 VPS74 URH1 HLR1 GEA2 GPA2 PRO3 PHM8 PAB1 RGD2 PHO4 RET2 PAN2 RPL9A MPT5 ATG1 MCM6 SEC15 RPS23A MSM1 PBP1 HGH1 HSV2 YHB1 PUP2 RPL27A SLT2 FSH1 TRM5 SBE22 DMA1 ARO9 SPC97 RRD1 VPS53 SFH5 FAS1 PDC1 SHM2 RPL22A GIS3 AHP1 PDC5 DPH5 SSP120 CDC…	132	2026
extracellular region [GO:0005576]	0.0002017	SCW11 DSE2 PRY3 HSP150 CWP1 CWP2 PRY2 CTS1 GAS3 SCW10 SUN4 KRE1 AGA1 DSE4	14	95
cytosol [GO:0005829]	0.00045263	ARA1 RNQ1 NTH1 VPS74 GEA2 GLN3 ATG18 ATG1 GCN1 YHB1 RHO3 SFH5 FAS1 ADE16 PDC1 CDC25 CAR2 VTS1 ALD6 CAR1 FAS2	21	192
mitochondrion [GO:0005739]	0.00104595	FUS3 PET9 COR1 PET112 GPI18 VPS15 OPY1 EXO5 ILV6 PGK1 MSS2 GDH2 SNQ2 GCV1 BAP3 DOA4 TPS2 GIS1 MRPL7 IRC3 MZM1 GPA2 AGX1 FAB1 RSM23 NUT1 GCN1 MRP13 PCP1 MSM1 PBP1 YHB1 PUP2 MTM1 TNA1 BIO2 VMR1 MSH1 AIM46 GTT1 COA3 CYC1 MIR1 ATP2 MDH1 FAS1 TOR2 RAX2 MDN1 MDL1 FMP27 ALO1 COQ5 MSC1 EIS1 IMP2 ABF2 ILV2 MRPS8 PFK2 MSK1 DBP2 ACC1 ELG1 MSB1 ULS1 ALD4 ALD6 AFT2 FAS2 ATP15 CCL1 MDM36 NCE102	74	1072
microtubule organizing center [GO:0005815]	0.00241553	SPC97 SPC98	2	2
acetolactate synthase complex [GO:0005948]	0.00241553	ILV6 ILV2	2	2
fatty acid synthase complex [GO:0005835]	0.00241553	FAS1 FAS2	2	2
gamma-tubulin small complex, spindle pole body [GO:0000928]	0.00701018	SPC97 SPC98	2	3
cellular bud membrane [GO:0033101]	0.00794973	TPO1 ENB1 NCE102	3	9
anchored to membrane [GO:0031225]	0.00952158	DSE2 PRY3 CWP1 CWP2 YPS3 GAS3 KRE1 AGA1	8	61
MIPS Functional Classification
Category	p-value	In Category from Cluster	k	f
regulator of G-protein signalling [18.02.05]	0.000388041	FUS3 RGD2 CDC25 ROM2 BEM3	5	14
phosphate metabolism [01.04]	0.000587656	FUS3 YPK3 VPS15 ISW1 PPS1 ADP1 PGK1 MPS1 YPD1 TPS2 ARO1 MSS4 PPN1 FAB1 ATG1 CDC55 VMR1 THR1 SLT2 CDC6 TOR2 KNS1 MDN1 MDL1 TPP1 PFK2 SKY1 NRK1 NPR1 MCK1 CMK2 TPT1 RTS1 PTP2 PHO85	35	401
osmosensing and response [34.11.03.13]	0.00133702	RGD1 YPD1 DOA4 SLT2 STD1 PTP2 HAL1	7	35
DNA repair [10.01.05.01]	0.00199836	POL3 GIS1 RAD51 RPH1 PAN2 MSH1 RRD1 SRS2 RFC2 RAD52 IMP2 TPP1 MKT1 MCK1 ULS1 CCL1 MMS1	17	159
degradation of arginine [01.01.03.05.02]	0.00241553	CAR2 CAR1	2	2
budding, cell polarity and filament formation [43.01.03.05]	0.00282443	BEM1 MSS4 GIC2 SBE2 GPA2 CDC55 SEC15 SLT2 TRM5 STE12 SBE22 RHO3 AXL2 HSP150 HOC1 PHD1 RGR1 RAX2 BUD8 ROM2 APP1 BUD17 MSB1 SUR1 BEM3 RBD2 PLC1	27	312
alcohol fermentation [02.16.01]	0.00289128	ADH5 PDC1 PDC5 ALD4	4	13
cell wall [42.01]	0.00393735	LRE1 SBE2 HLR1 MPT5 SLT2 SBE22 SET1 DSE2 HSP150 HOC1 CWP1 CWP2 MID2 BUD8 ROM2 GAS3 MKS1 KRE1 PLC1 KRE6	20	213
transcription activation [11.02.03.04.01]	0.00399207	OAF1 SWD1 PDR3 GLN3 MOT3 IZH4 CTI6	7	42
directional cell growth (morphogenesis) [40.01.03]	0.00414959	BEM1 GIC2 RGD2 SLT2 ROM2 BEM3	6	32
translational control [12.07]	0.0050793	NGR1 PAT1 PAB1 GCN1 RPS23A TAP42 CAM1 TIF5	8	55
pheromone response, mating-type determination, sex-specific proteins [34.11.03.07]	0.0052661	FUS3 OPY1 BEM1 GIC2 GPA2 RAD51 MPT5 STE12 PRY3 RGR1 MID2 ROM2 RAD52 MCK1 AGA1 ULS1 PTP2 BEM3	18	189
regulation of nitrogen metabolism [01.02.07.01]	0.00549854	GLN3 MKS1 NPR1	3	8
sugar, glucoside, polyol and carboxylate catabolism [01.05.02.07]	0.00607229	ARA1 PGK1 NTH1 MDH1 PFK2 SCW10 SUN4 ZWF1 DSE4 KRE6	10	81
mating (fertilization) [41.01.01]	0.00632701	OPY1 BEM1 PRM7 RAD51 STE12 MID2 SCW10 AGA1 ULS1	9	69
biosynthesis of threonine [01.01.06.04.01]	0.00701018	THR4 THR1	2	3
homeostasis of phosphate [34.01.03.03]	0.00794973	PHO90 MIR1 PHO91	3	9
translation [12.04]	0.00823413	MAP2 PAB1 PAN2 SNU114	4	17
DNA recombination [10.01.05.03]	0.00923965	HPR1 RTT109 ELG1 ULS1 MMS1	5	27
MIPS Phenotypes
Category	p-value	In Category from Cluster	k	f
other cell wall mutants [52.15.99]	0.00284164	LRE1 MSS4 SLT2 SET1 CWP2 CDC25 BUD8 MKS1 KRE1 KRE6	10	73
Cycloheximide resistance [92.35.05]	0.00356579	PDR3 RPL42A PUF2	3	7
Caffeine resistance [92.65.05]	0.00356579	RRD1 BUD8 MKS1	3	7
Slow-growth (slg) [12.15]	0.00620794	MAP2 NGR1 PAT1 FAB1 RSC1 VMR1 RPL27A STE12 MSH1 ARO9 RHO3 GTT1 PEX2 AMD1 SKY1 DBP2 PTP2 PHO85 ALD6 MAK3 KRE6	21	237
MIPS Subcellular Localization
Category	p-value	In Category from Cluster	k	f
cell wall [710]	3.25639e-05	SCW11 DSE2 HSP150 CWP1 CWP2 CTS1 SCW10 SUN4 KRE1 DSE4	10	43
cytoplasm [725]	9.02327e-05	CYS3 SYN8 OAF1 PDR3 FUS3 MAP2 YPK3 OPY1 ADH5 ARA1 RPS6B NGR1 ISW1 RGD1 REI1 STP22 RNQ1 ADP1 PGK1 SNT1 THR4 ATG15 PAT1 RPP1A MSS2 RPL41B SAS10 RPL41A GDH2 YPD1 NTH1 TPS2 ARX1 ALT2 ARO1 SAS4 MSS4 ADR1 RSC3 GIC2 VPS74 URH1 PPN1 HLR1 GEA2 PRO3 PHM8 GLN3 RAD51 PAB1 AGX1 RGD2 FAB1 PHO4 RET2 PAN2 RPL9A MPT5 ATG1 CDC55 GCN1 MCM6 SEC15 PEX31 RPS23A PBP1 HGH1 YHB1 PUP2 COS8 RPL27A THR1 SLT2 FSH1 TRM5 SBE22…	175	2879
mitochondria [755]	0.000746107	FUS3 PET9 COR1 PET112 GPI18 VPS15 OPY1 SPP381 EXO5 ILV6 MSS2 GDH2 SNQ2 GCV1 BAP3 DOA4 TPS2 GIS1 MRPL7 IRC3 MZM1 GPA2 AGX1 FAB1 RSM23 NUT1 GCN1 MRP13 PCP1 MSM1 PBP1 YHB1 MTM1 TNA1 BIO2 VMR1 MSH1 AIM46 GTT1 COA3 CYC1 MIR1 ATP2 MDH1 FAS1 TOR2 RAX2 MDN1 YPS3 MDL1 FMP27 ALO1 COQ5 MSC1 EIS1 IMP2 ABF2 ILV2 MRPS8 MSK1 DBP2 ACC1 ELG1 MSB1 ULS1 YPK9 ALD4 ALD6 AFT2 FAS2 ATP15 CCL1 NCE102	73	1042
neck [705.03]	0.00323618	BEM1 RGD1 MPS1 RGD2 SEC15 AXL2 CWP2 RAX2 BUD8 ROM2 MSB1 BEM3 HOS3	13	112
extracellular [701]	0.00402619	DSE2 HSP150 CWP1 CWP2 SSP120 CTS1 SUN4 KRE1	8	53
MIPS Protein Complexes
Category	p-value	In Category from Cluster	k	f
Complex Number 196, probably transcription/DNA maintanance/chromatin structure [550.1.196]	0.000558773	TAF5 ISW1 GCN1 PDC1 PFK2	5	15
Fatty acid synthetase, cytoplasmic [170]	0.00241553	FAS1 FAS2	2	2
Alpha-agglutinin anchor [40]	0.00241553	ILV6 ILV2	2	2
Complex Number 233 [550.2.233]	0.00289128	CDC55 TAP42 MKT1 RTS1	4	13
Complex Number 224 [550.2.224]	0.00356579	AGX1 YHB1 PHO85	3	7
Complex Number 195, probably transcription/DNA maintanance/chromatin structure [550.1.195]	0.00452459	ARO1 RAD51 YHB1 RAD52 MKT1	5	23
Complex Number 301 [550.2.301]	0.00549854	RNQ1 RFC2 ELG1	3	8
Complex Number 149 [550.2.149]	0.00701018	KNS1 CAR2	2	3
Complex Number 482 [550.2.482]	0.00701018	DMA1 DMA2	2	3
gamma-tubulin complex [480.10.05]	0.00701018	SPC97 SPC98	2	3
Complex Number 51, probably intermediate and energy metabolism [550.1.51]	0.00701018	CYS3 ADE4	2	3
Complex Number 347 [550.2.347]	0.00794973	SIF2 SNT1 AVT2	3	9
Complex Number 383 [550.2.383]	0.00794973	RNQ1 ARO1 CPA1	3	9
Complex Number 199, probably transcription/DNA maintanance/chromatin structure [550.1.199]	0.00794973	SWD1 DOA4 SET1	3	9
MIPS Protein Classes
Category	p-value	In Category from Cluster	k	f
PP2A-associated [181.21.21]	7.99022e-05	CDC55 RRD1 TAP42 RTS1	4	6
SMART Domains
Category	p-value	In Category from Cluster	k	f
<A href='http://smart.embl-heidelberg.de/smart/do_annotation.pl?DOMAIN=PIPKc&BLAST=DUMMY'>PIPKc</A>	0.00241553	MSS4 FAB1	2	2
<A href='http://smart.embl-heidelberg.de/smart/do_annotation.pl?DOMAIN=JmjN&BLAST=DUMMY'>JmjN</A>	0.00701018	GIS1 RPH1	2	3
<A href='http://smart.embl-heidelberg.de/smart/do_annotation.pl?DOMAIN=SCP&BLAST=DUMMY'>SCP</A>	0.00701018	PRY3 PRY2	2	3
<A href='http://smart.embl-heidelberg.de/smart/do_annotation.pl?DOMAIN=ELFV_dehydrog&BLAST=DUMMY'>ELFV_dehydrog</A>	0.00701018	GDH2 GDH1	2	3
PFam-A Domains
Category	p-value	In Category from Cluster	k	f
<A href='http://pfam.sanger.ac.uk/family?id=Rhomboid'>Rhomboid</A>	0.00241553	PCP1 RBD2	2	2
<A href='http://pfam.sanger.ac.uk/family?id=PIP5K'>PIP5K</A>	0.00241553	MSS4 FAB1	2	2
<A href='http://pfam.sanger.ac.uk/family?id=Spc97_Spc98'>Spc97_Spc98</A>	0.00241553	SPC97 SPC98	2	2
<A href='http://pfam.sanger.ac.uk/family?id=TPP_enzyme_N'>TPP_enzyme_N</A>	0.00356579	PDC1 PDC5 ILV2	3	7
<A href='http://pfam.sanger.ac.uk/family?id=TPP_enzyme_M'>TPP_enzyme_M</A>	0.00356579	PDC1 PDC5 ILV2	3	7
<A href='http://pfam.sanger.ac.uk/family?id=TPP_enzyme_C'>TPP_enzyme_C</A>	0.00356579	PDC1 PDC5 ILV2	3	7
<A href='http://pfam.sanger.ac.uk/family?id=JmjN'>JmjN</A>	0.00701018	GIS1 RPH1	2	3
<A href='http://pfam.sanger.ac.uk/family?id=JmjC'>JmjC</A>	0.00701018	GIS1 RPH1	2	3
<A href='http://pfam.sanger.ac.uk/family?id=CitMHS'>CitMHS</A>	0.00701018	PHO90 PHO91	2	3
<A href='http://pfam.sanger.ac.uk/family?id=Na_sulph_symp'>Na_sulph_symp</A>	0.00701018	PHO90 PHO91	2	3
<A href='http://pfam.sanger.ac.uk/family?id=Aminotran_5'>Aminotran_5</A>	0.00701018	AGX1 SER1	2	3
<A href='http://pfam.sanger.ac.uk/family?id=SCP'>SCP</A>	0.00701018	PRY3 PRY2	2	3
<A href='http://pfam.sanger.ac.uk/family?id=ELFV_dehydrog'>ELFV_dehydrog</A>	0.00701018	GDH2 GDH1	2	3
Yeast Two Hybrid - Uetz
Category	p-value	In Category from Cluster	k	f
YIL113W (SDP1)	0.00241553	SLT2 KNS1	2	2
Yeast Two Hybrid - Ito (core)
Category	p-value	In Category from Cluster	k	f
Yeast Two Hybrid - Ito (full)
Category	p-value	In Category from Cluster	k	f
YGR196C (FYV8)	0.00241553	RGD1 PUP2	2	2
YDR508C (GNP1)	0.00241553	LEO1 CCL1	2	2
YGL237C (HAP2)	0.00356579	MTH1 ECL1 STD1	3	7
Synthetic Genetic Array Analysis
Category	p-value	In Category from Cluster	k	f
MDS Proteomics Complexes
Category	p-value	In Category from Cluster	k	f
YDL188C (PPH22)	0.00208161	CDC55 TAP42 MKT1 RTS1	4	12
YDR260C (SWM1)	0.00549854	RNQ1 ARO1 CPA1	3	8
YPL149W (APG5)	0.00701018	CYS3 FET3	2	3
YNL053W (MSG5)	0.00701018	FUS3 SLT2	2	3
YNL290W (RFC3)	0.00794973	MAP2 RNQ1 SHM2	3	9
Cellzome Complexes
Category	p-value	In Category from Cluster	k	f
YER095W (RAD51)	0.00141088	ARO1 RAD51 YHB1 RAD52 MKT1	5	18
YPL082C (MOT1)	0.00549854	ISW1 GCN1 PDC1	3	8
YAR003W (SWD1)	0.00549854	SWD1 DOA4 SET1	3	8
YMR300C (ADE4)	0.00701018	CYS3 ADE4	2	3
YBR267W	0.00701018	REI1 ARX1	2	3
Proteome Localization--Observed
Category	p-value	In Category from Cluster	k	f
cyto	0.000980889	CYS3 SYN8 OAF1 FUS3 MAP2 OPY1 RPS6B NGR1 REI1 RNQ1 PGK1 SNT1 MSS2 RPL41A GDH2 NTH1 TPS2 MSS4 GIC2 VPS74 PPN1 GEA2 PRO3 PHM8 PAB1 AGX1 RGD2 RPL9A MPT5 ATG1 GCN1 PEX31 RPS23A PBP1 HGH1 PUP2 THR1 SLT2 FSH1 TRM5 SBE22 DMA1 ARO9 DSE2 RRD1 VPS53 PRY3 PHO90 FAS1 YEH1 KNS1 TPO1 ADE16 PDC1 SHM2 RPL22A GIS3 HRT3 AHP1 DPH5 RPP0 BUD8 CAR2 AMD1 NAB6 MSC1 PFK2 DMA2 NRK1 NPR1 VID27 ZWF1 KRE1 BRE5 CMK2 RIB2 RTS1…	88	1321
mixed (cyto / ER)	0.00172239	ADP1 RET2 HSP150 CWP1 CWP2 LCB1 SCW10 YIP3 ACC1 SEC16 NCE102	11	80
Proteome Localization--Predicted+Observed
Category	p-value	In Category from Cluster	k	f
Deletions Consortium (Essentiality, Morphology)
Category	p-value	In Category from Cluster	k	f
Morphology - Large	0.00186634	BEM1 HPR1 MZM1 RAD51 RSC1 SLT2 HOC1 RTT109 PDC1 GIS3 ROM2 RAD52 MSC1 EIS1 HOS3 PLC1 MMS1	17	158
Yeast Fitness Data
Category	p-value	In Category from Cluster	k	f
Slow Growers	0.00683935	COR1 EXO5 RPS6B BEM1 REI1 PAT1 TUP1 RPP1A MSS2 DOA4 TPS2 ARO1 HPR1 IRC3 GLN3 RAD51 FAB1 RSM23 RSC1 PCP1 RPS23A MSM1 MTM1 RPL27A VMA10 MSH1 VPS53 RTT109 PDC1 FRE8 ERG3 RPL22A ROM2 RAD52 COQ5 ABF2 MRPS8 PFK2 MSK1 PHO85 PLC1 ATP15 KRE6 MMS1	44	616
Published Complexes
Category	p-value	In Category from Cluster	k	f

## Sheet: GO fpr4 (357 DE genes)
Genes Entered to Funspec: 357 (74+36+153+94 from Figure 4B)
Input Cluster (n=353)
Genes Not Found:
GPP2
MIM2
NDC80
SEG1
GO Molecular Function
Category	p-value	In Category from Cluster	k	f
RNA binding [GO:0003723]	7.69216e-06	NCL1 HEK2 GBP2 SRO9 KRR1 LHP1 TRM3 NOP6 TMA64 CFT1 NPL3 NUG1 LSM4 ECM32 RNA15 RPL1B TIF4631 RNH70 RPF1 PRP8 DBP8 SCP160 DRS1 DPS1 ECM16 RRP5 RLP7 IDH1 NOP15 WHI3 NOP12 NOP8 IDH2 BFR1 DED1 NOP4 RPL1A MRD1	38	337
nucleotide binding [GO:0000166]	1.91411e-05	SSA1 PSK1 RBG1 PIM1 MCX1 GBP2 GLK1 APA1 RBK1 RTK1 LHP1 STE7 NOP6 RVB1 NPL3 PKH1 EMI2 AFG1 NUG1 BRR2 ECM32 SMC1 SMC2 HXK1 RNA15 PKP2 MSP1 ADE3 MYO1 YCK1 DBP8 STH1 MTR4 CCT7 RPB4 SWE1 SSC1 TOR1 ADO1 STE6 DRS1 DPS1 MDN1 RCK2 STT4 PIF1 UBC7 MYO5 ECM16 NOP15 KRE33 YCK2 WHI3 ORC5 NOG2 NOP12 NOP8 VPS21 GLN4 DED1 RFC1 NOP4 MOT1 BMS1 NEW1 RVB2 MRD1 VPS4	68	778
DNA secondary structure binding [GO:0000217]	0.000151565	SPT2 SMC1 SMC2	3	3
alpha,alpha-trehalose-phosphate synthase (UDP-forming) activity [GO:0003825]	0.000151565	TPS1 TSL1 TPS3	3	3
ATP binding [GO:0005524]	0.000190953	SSA1 PSK1 PIM1 MCX1 GLK1 APA1 RBK1 RTK1 STE7 RVB1 PKH1 EMI2 AFG1 BRR2 ECM32 SMC1 SMC2 HXK1 PKP2 MSP1 ADE3 MYO1 RPF1 YCK1 DBP8 STH1 MTR4 CCT7 SWE1 SSC1 TOR1 ADO1 STE6 DRS1 DPS1 MDN1 RCK2 STT4 PIF1 UBC7 MYO5 ECM16 KRE33 YCK2 ORC5 BRX1 GLN4 DED1 RFC1 MOT1 BMS1 NEW1 RVB2 VPS4	54	622
nucleic acid binding [GO:0003676]	0.000228137	GBP2 SPB1 LHP1 NOP6 CFT1 NPL3 BRR2 RNA15 RNH70 DBP8 STH1 MTR4 MSN4 DRS1 DPS1 STP3 DUS3 ECM16 NOP15 WHI3 GIS2 NOP12 NOP8 RAT1 DED1 RAD1 NOP4 MOT1 MRD1	29	270
phosphotransferase activity, alcohol group as acceptor [GO:0016773]	0.000659633	GLK1 RBK1 EMI2 HXK1 TOR1 ADO1 STT4	7	29
hexokinase activity [GO:0004396]	0.00139763	GLK1 EMI2 HXK1	3	5
ATPase activity [GO:0016887]	0.00242979	SSA1 RVB1 SMC1 SMC2 MSP1 DBP8 STH1 SSC1 STE6 MDN1 MOT1 NEW1 RVB2 VPS4	14	112
glucokinase activity [GO:0004340]	0.00285037	GLK1 EMI2	2	2
isocitrate dehydrogenase (NAD+) activity [GO:0004449]	0.00285037	IDH1 IDH2	2	2
transferase activity, transferring glycosyl groups [GO:0016757]	0.00329399	CHS3 TPS1 PMT5 GLC3 OCH1 CRH1 GPI1 GSY2 APT1 ALG12 DPM1	11	80
transferase activity [GO:0016740]	0.0062025	PSK1 NCL1 CHS3 TPS1 HIS7 GLK1 APA1 SPB1 RBK1 RTK1 PMT5 TRM3 RPO21 STE7 HEM1 ADE8 RAD30 PKH1 EMI2 GLC3 RPO41 HXK1 OCH1 PKP2 GPI1 YCK1 BAT1 SWE1 TOR1 ADO1 YKT6 RCK2 GSY2 STT4 TAL1 APT1 ARG7 YCK2 ALG12 PFA4 TRM10 OST3 OST2 RPB2 PIS1 DPB2 DPM1	47	611
SNAP receptor activity [GO:0005484]	0.00776795	SEC9 YKT6 SED5 VTI1 SSO1	5	24
helicase activity [GO:0004386]	0.00788211	RVB1 BRR2 ECM32 DBP8 STH1 MTR4 DRS1 PIF1 ECM16 DED1 MOT1 RVB2	12	102
tRNA (guanine) methyltransferase activity [GO:0016423]	0.00824797	TRM3 TRM10	2	3
trehalose-phosphatase activity [GO:0004805]	0.00824797	TSL1 TPS3	2	3
AT DNA binding [GO:0003680]	0.00824797	SMC1 SMC2	2	3
rRNA primary transcript binding [GO:0042134]	0.00824797	RPF1 BRX1	2	3
DNA helicase activity [GO:0003678]	0.00875279	RVB1 ECM32 PIF1 RVB2	4	16
enzyme regulator activity [GO:0030234]	0.00875279	COX13 SSC1 TSL1 TPS3	4	16
oxidoreductase activity, acting on the CH-OH group of donors, NAD or NADP as acceptor [GO:0016616]	0.00929374	SER33 HMG2 IDH1 MDH2 IDH2	5	25
binding [GO:0005488]	0.00963247	SKT5 PRP6 LYS2 HSM3 CTR86 MAK21 SEC7 ERG26 TIF4631 ADE3 SDA1 GND1 SER33 CPR7 TOR1 HOM6 TTI1 STU2 STT4 RRP5 TOM70 MDH2 STI1 SHE4 MOT1 NEW1	26	300
GO Biological Process
Category	p-value	In Category from Cluster	k	f
ribosome biogenesis [GO:0042254]	1.07071e-11	SPB1 KRR1 RPS14A NOP6 MAK21 UTP4 NPL3 NUG1 UTP7 LOC1 RPS0A SDA1 RNH70 RPF1 DBP8 TOR1 MRT4 DRS1 RSA3 ECM16 RRP5 RLP7 RPS7B NOP15 KRI1 NOG2 NOP12 BRX1 NOP8 NOB1 RPS7A NOC2 NOP4 BMS1	34	170
rRNA processing [GO:0006364]	8.51052e-09	SPB1 KRR1 RPS14A NOP6 UTP4 NPL3 NUG1 UTP7 LSM4 RPS0A RNH70 ZUO1 RPF1 DBP8 MTR4 MRT4 DRS1 MDN1 PWP1 ECM16 RRP5 RPS7B NOP15 KRI1 NOP12 RAT1 RPS7A NOP4 MOT1 BMS1 RVB2 MRD1	32	195
trehalose biosynthetic process [GO:0005992]	0.000247152	TPS1 TSL1 PGM2 TPS3	4	7
glucose 6-phosphate metabolic process [GO:0051156]	0.000582146	GLK1 EMI2 PGM2	3	4
ribosomal large subunit biogenesis [GO:0042273]	0.000606582	LOC1 TIF4631 SDA1 MRT4 RLP7 NOP15 NOP8 JIP5	8	37
endonucleolytic cleavage in ITS1 to separate SSU-rRNA from 5.8S rRNA and LSU-rRNA from tricistronic rRNA transcript (SSU-rRNA, 5.8S rRNA, LSU-rRNA) [GO:0000447]	0.00104999	KRR1 UTP7 LOC1 RPS0A DBP8 RRP5 KRI1 MRD1	8	40
protein refolding [GO:0042026]	0.00113597	SSA1 MCX1 CPR7 SSC1 MGE1	5	16
response to stress [GO:0006950]	0.00116898	SSA1 TIP1 TPS1 HIS7 BSD2 TIR1 ASG1 CPR7 SSC1 MSN4 PSR1 TSL1 HOR7 TPS3 SIW14 NST1 STI1 WHI2	18	152
intra-Golgi vesicle-mediated transport [GO:0006891]	0.00132392	SEC7 TRS120 COG2 YKT6 SED5 VTI1	6	24
protein folding [GO:0006457]	0.00166508	SSA1 FPR2 BUD27 PHB1 ZUO1 CCT7 CPR7 SSC1 FPR4 SIS1 STI1 MGE1 CWC27	13	96
glycogen biosynthetic process [GO:0005978]	0.00282144	GLC3 GSY2 PGM2 GAC1	4	12
AMP biosynthetic process [GO:0006167]	0.00285037	ADO1 APT1	2	2
RNA processing [GO:0006396]	0.00300904	PRP6 LHP1 TRM3 RPL1B RRP5 RAT1 RPL1A	7	37
fungal-type cell wall organization [GO:0031505]	0.00326302	TIP1 ECM33 HKR1 CRH1 BGL2 SIM1 MHP1 CIS3 KRE9 TOR1 CNB1 UBC7 ARG7 MYO5 WSC2	15	128
ribosomal large subunit assembly [GO:0000027]	0.00352295	MAK21 RPF1 MRT4 DRS1 MDN1 RSA3 BRX1	7	38
sterol biosynthetic process [GO:0016126]	0.00372648	ERG26 ERG4 ERG11 NCP1 ECM22 HMG2	6	29
glutamate biosynthetic process [GO:0006537]	0.00390544	PUT1 ACO1 IDH1 IDH2	4	13
carbohydrate metabolic process [GO:0005975]	0.00408357	GLK1 RBK1 EMI2 GLC3 HXK1 PKP2 PCL10 CRH1 BGL2 TAL1 PGM2 MDH2	12	94
intracellular mRNA localization [GO:0008298]	0.00524001	HEK2 LOC1 SCP160 SHE4	4	14
mitotic cell cycle spindle assembly checkpoint [GO:0007094]	0.00525449	PPH22 MAD1 CEP3 HHT2 GAC1	5	22
ergosterol biosynthetic process [GO:0006696]	0.00642544	ERG26 ERG4 ERG11 NCP1 HMG2	5	23
ribosomal small subunit biogenesis [GO:0042274]	0.00776795	KRR1 NOP6 KRE33 NOB1 NEW1	5	24
glucose import [GO:0046323]	0.00824797	GLK1 HXK1	2	3
cytokinesis, actomyosin contractile ring assembly [GO:0000915]	0.00824797	MYO1 NOP15	2	3
response to glucose stimulus [GO:0009749]	0.00824797	YCK1 YCK2	2	3
ribosome assembly [GO:0042255]	0.00824797	NOC2 BMS1	2	3
steroid biosynthetic process [GO:0006694]	0.00929374	ERG26 ERG4 ERG11 NCP1 HMG2	5	25
tRNA processing [GO:0008033]	0.00976512	NCL1 LHP1 TRM3 LSM4 SUA5 RNH70 KAE1 DUS3 DUS4 TRM10	10	80
GO Cellular Component
Category	p-value	In Category from Cluster	k	f
nucleolus [GO:0005730]	1.34837e-12	NCL1 RRN10 SPB1 KRR1 RPS14A LHP1 NOP6 MAK21 UTP4 NPL3 NUG1 UTP7 LSM4 LOC1 SDA1 ZUO1 RPF1 SPO12 DBP8 RRT14 MTR4 MRT4 DRS1 PWP1 RSA3 PIF1 ECM16 RRP5 RLP7 RPS7B NOP15 KRE33 KRI1 NOG2 NOP12 BRX1 NOP8 NOB1 RPS7A NOC2 NOP4 BMS1 MRD1 JIP5	44	253
nucleus [GO:0005634]	2.18894e-07	SSA1 NCL1 RRN10 HEK2 HHF1 PRP6 AMN1 AME1 HSM3 GBP2 APA1 SPB1 KRR1 RPS14A RBK1 LHP1 RPO21 RPC53 NOP6 PHO13 MAK21 NGG1 RVB1 CFT1 UTP4 SKP1 SPC110 ADE8 RAD30 NPL3 SSN2 KRE28 NUG1 CHZ1 RGI1 UTP7 LSM4 RTR1 SPT2 BRR2 SMC1 IES1 LOC1 SMC2 RSC8 PGD1 RNA15 MAD1 SUT1 SUA5 NUP57 CAF130 PRE9 ADE3 SDA1 RNH70 SNF6 RPF1 CRP1 SPO12 PRP8 DBP8 CTF8 MOB1 STH1 RRT14 ASG1 MTR4 SCP160 RPB4 SWE1 SSC1 TOR1 ADO1 HOM6 MRT4…	149	1965
preribosome, large subunit precursor [GO:0030687]	1.35766e-05	SPB1 NUG1 LOC1 RPF1 MRT4 DRS1 RSA3 RLP7 NOP15 NOG2 BRX1	11	44
90S preribosome [GO:0030686]	2.92478e-05	KRR1 RPS14A NOP6 UTP4 UTP7 RPS0A DBP8 ECM16 RPS16A RRP5 KRE33 RPS7A BMS1 MRD1	14	74
polysome [GO:0005844]	5.58087e-05	SSA1 RBG1 SRO9 ECM32 ZUO1 SCP160 BFR1 NEW1	8	27
cytoplasm [GO:0005737]	0.000221261	SSA1 PSK1 ATS1 RBG1 HEK2 CHS3 RFS1 LYS2 TPS1 AMN1 ARC40 HIS7 HSM3 SRO9 APA1 RPS14A RBK1 CTR86 TRM3 STE7 PHO13 PST2 CDC37 SEC7 VPS64 SKP1 RPP2B SAC7 ADE8 NPL3 PSP1 EMI2 RBA50 KRE28 GLC3 RGI1 LSM4 RTR1 UBP3 ECM32 BUD27 SMC2 RET2 HXK1 RPL7A PCL10 RPL1B SUT1 SUA5 CAF130 PRE9 BTN2 TIF4631 ADE3 RPS0A ENO1 ZUO1 GND1 SER33 MOB1 HYR1 MHP1 CCT7 MTC1 RPB4 TOR1 ADO1 HOM6 TTI1 MSN4 RPS27A RCN1 SAP190 KAE1 DRE…	139	2026
alpha,alpha-trehalose-phosphate synthase complex (UDP-forming) [GO:0005946]	0.000582146	TPS1 TSL1 TPS3	3	4
mitochondrial matrix [GO:0005759]	0.000766612	PIM1 MCX1 HEM1 RPO41 PKP2 BAT1 SSC1 ISA1 PUT1 ACO1 ARG7 IDH1 ATP11 IDH2 MGE1	15	111
extracellular region [GO:0005576]	0.00151078	SSA1 TIP1 ECM33 TOS1 PST2 TIR1 CRH1 BGL2 BAR1 CIS3 KRE9 KSH1 PLB3	13	95
mitochondrial isocitrate dehydrogenase complex (NAD+) [GO:0005962]	0.00285037	IDH1 IDH2	2	2
Noc1p-Noc2p complex [GO:0030690]	0.00285037	MAK21 NOC2	2	2
small-subunit processome [GO:0032040]	0.00309741	KRR1 RPS14A UTP4 UTP7 ECM16 RRP5 RPS7B RPS7A	8	47
ASTRA complex [GO:0070209]	0.00451283	RVB1 TTI1 RVB2	3	7
Arp2/3 protein complex [GO:0005885]	0.00693643	ARC40 ARC18 CRN1	3	8
ribonucleoprotein complex [GO:0030529]	0.0069566	KRR1 RPS14A LHP1 UTP4 RPP2B NPL3 UTP7 LSM4 RPL7A RPL1B RPS0A PRP8 RPS27A MLP1 RSA3 ECM16 RPS16A RRP5 RPL9B RPS7B NOP15 RPS7A MRPL23 PET123 BFR1 RPL1A MRD1	27	307
endoplasmic reticulum [GO:0005783]	0.0080593	YPC1 BSD2 PMT5 SEC31 VPS64 FPR2 ERG26 ERG4 OCH1 VRG4 ERG11 NCP1 BIG1 ERP5 YCK1 MNL1 SCP160 CIS3 SOP4 PER33 HMG2 UBC7 HOR7 ALG12 PFA4 MDM12 NOB1 SLD7 OST3 YOP1 PIS1 VPS4 SEC23 DPM1	34	416
chromosome [GO:0005694]	0.00927891	HEK2 HHF1 AME1 GBP2 SKP1 KRE28 SMC1 SMC2 SUA5 MOB1 CSE4 KAE1 CEP3 HHT2	14	130
SNARE complex [GO:0031201]	0.00929374	SEC9 YKT6 SED5 VTI1 SSO1	5	25
MIPS Functional Classification
Category	p-value	In Category from Cluster	k	f
ATP binding [16.19.03]	2.76478e-06	SSA1 PIM1 MCX1 VBA2 RBK1 RVB1 SKP1 AFG1 BRR2 SMC1 SMC2 MSP1 DBP8 STH1 MTR4 SSC1 STE6 DRS1 MDN1 UBC7 VBA1 APC1 ORC5 MOT1 NEW1 RVB2 VPS4	27	191
ribosome biogenesis [12.01]	5.00349e-06	KRR1 NUG1 LOC1 SDA1 TOR1 MRT4 ECM16 RLP7 NOP15 GIS2 KRI1 NOG2 NOC2 BMS1	14	64
rRNA processing [11.04.01]	2.88184e-05	SPB1 KRR1 NOP6 UTP4 NPL3 NUG1 UTP7 LSM4 RPF1 DBP8 MTR4 MRT4 DRS1 MDN1 ECM16 RRP5 RLP7 NOP8 RAT1 NOP4 BMS1 RVB2 MRD1	23	169
phosphate metabolism [01.04]	0.000167072	SSA1 PSK1 GLK1 APA1 RBK1 RTK1 STE7 PPH22 PHO13 RVB1 PKH1 AFG1 SMC1 SMC2 HXK1 PKP2 MSP1 YCK1 STH1 SWE1 SSC1 TOR1 ADO1 CNB1 STE6 SAP190 PSR1 MDN1 RCK2 STT4 SIW14 YCK2 ORC5 GAC1 MOT1 PPQ1 NEW1 RVB2 VPS4	39	401
RNA binding [16.03.03]	0.000167118	RRN10 HEK2 GBP2 SRO9 RPS14A LHP1 TMA64 CFT1 UTP4 NPL3 UTP7 LOC1 RNA15 RPF1 SCP160 RRP5 RLP7 WHI3 NOP12 BRX1 BFR1 NOP4 MRD1	23	189
enzymatic activity regulation / enzyme regulator [18.02.01]	0.000217321	VAM6 PCL10 COX13 MOB1 SWE1 SSC1 RCN1 CNB1 TSL1 SIW14 PCL1 GAC1 CLN2	13	78
stress response [32.01]	0.000366153	TIP1 TPS1 RTK1 MRH1 FPR2 TIR1 YCK1 RPB4 CIS3 SSC1 MSN4 PSR1 FPS1 TSL1 UBC7 HOR7 TPS3 SIW14 YCK2 WHI2	20	162
metabolism of energy reserves (e.g. glycogen, trehalose) [02.19]	0.000658129	TPS1 HKR1 GLC3 PCL10 KRE9 GSY2 TSL1 PGM2 TPS3 GAC1	10	56
general transcription activities [11.02.03.01]	0.000726317	RRN10 RPO21 NGG1 RVB1 SSN2 RBA50 RPO41 PGD1 SUT1 RPB4 SWI6 ECM22 URE2 GAL11 HIR2 RPB2 MBF1 TFC8	18	146
unfolded protein response (e.g. ER quality control) [32.01.07]	0.000969761	SSA1 MCX1 CDC37 ZUO1 CCT7 CPR7 SIS1 ATP11 STI1 NOB1 MGE1	11	69
intra Golgi transport [20.09.07.05]	0.00150097	SEC7 COG2 YKT6 SED5 VTI1 VPS27 VPS4	7	33
actin cytoskeleton [42.04.03]	0.00166508	ARC40 PPH22 SDA1 ACF4 SFK1 STT4 ARC18 CRN1 SIW14 WSC2 SHE4 WHI2 PIN3	13	96
cell wall [42.01]	0.00214992	SKT5 CHS3 TIP1 ECM33 PPH22 HKR1 PKH1 TIR1 ECM32 GPI1 BGL2 BIG1 MHP1 CIS3 KRE9 CNB1 SWI6 ARG7 MYO5 ECM16 WSC2 ALG12	22	213
cell growth / morphogenesis [40.01]	0.00254193	SKT5 ARC40 PPH22 RGP1 SUA5 MYO1 YCK1 KRE9 SWE1 CPR7 ACF4 ELF1 CNB1 CRN1 HOF1 YCK2 BNI4 STI1 SSO1 CLN2	20	189
NAD/NADP binding [16.21.07]	0.00255452	MET10 ADE3 GND1 SER33 HMG2 IDH1 IDH2	7	36
microtubule cytoskeleton [42.04.05]	0.00309741	ATS1 NUM1 CDC37 SPC110 SIM1 MHP1 STU2 CRN1	8	47
mitotic cell cycle [10.03.01.01]	0.00390544	AME1 SPO12 BFR1 CLN2	4	13
biosynthesis of glutamate [01.01.03.02.01]	0.00684858	PUT1 ACO1 IDH1 IDH2	4	15
regulation of C-compound and carbohydrate metabolism [01.05.25]	0.00709072	SKT5 TPS1 PPH22 NGG1 SKP1 HKR1 SSN2 PCL10 SNF6 MSN4 GSY2 CHS5 GAL11 GAC1	14	126
cellular export and secretion [20.09.16]	0.00715437	SEC9 ERP5 STE6 FPS1 STT4 SSO1 SYT1	7	43
metabolism of lysine [01.01.06.06]	0.00824797	VBA2 VBA1	2	3
metabolism of histidine [01.01.09.07]	0.00824797	VBA2 VBA1	2	3
budding, cell polarity and filament formation [43.01.03.05]	0.00857445	SKT5 CHS3 ARC40 STE7 PPH22 HKR1 BUD27 SEC9 RPS0A MYO1 YCK1 CIS3 KRE9 SWE1 ACF4 SAP190 KAE1 CHS5 CRN1 HOF1 MYO5 YCK2 WHI3 BNI4 BFR1 SSO1 CLN2	27	312
MIPS Phenotypes
Category	p-value	In Category from Cluster	k	f
Calcofluor white resistance [52.15.15.05]	0.000335023	SKT5 CHS3 PPH22 CHS5 ARG7 ALG12	6	19
Secretory mutants [52.45]	0.00131378	SEC31 SEC7 RET2 SEC9 COG2 VTI1 VPS21 VPS17 VPS4 SEC23	10	61
Silencing mutants [82.15.50]	0.00206838	HHF1 SPB1 NPL3 UBP3 HHT2 ORC5	6	26
Papulacandin B sensitivity [52.15.30.10]	0.00525449	ECM32 YCK1 ECM16 YCK2 ALG12	5	22
other cell cycle defects [22.99]	0.00713038	NUM1 CDC37 SKP1 SPC110 SMC1 SMC2 MYO1 BIG1 PRP8 BAT1 BAR1 MOB1 SIM1 HOF1 CEP3 APC1 WHI2 BFR1 RFC1 CLN2	20	207
Mutator phenotypes [82.25]	0.00824797	HSM3 RFC1	2	3
MIPS Subcellular Localization
Category	p-value	In Category from Cluster	k	f
nucleolus [750.05]	1.55769e-06	RRN10 KRR1 NOP6 MAK21 UTP4 NUG1 UTP7 LOC1 DBP8 RRT14 MTR4 MRT4 DRS1 PWP1 RSA3 FPR4 ECM16 RRP5 NOP15 KRE33 KRI1 NOP12 BRX1 TRM10 NOP8 NOC2 NOP4 BMS1 JIP5	29	208
nucleus [750]	8.65574e-06	SSA1 NCL1 RRN10 SKT5 HHF1 PRP6 AMN1 TOS1 HIS7 GBP2 APA1 SPB1 KRR1 RBK1 LHP1 RPO21 RPC53 PPH22 NOP6 PHO13 MAK21 CDC37 NGG1 RVB1 CFT1 UTP4 SKP1 SAC7 ADE8 RAD30 NPL3 SSN2 PSP1 GLC3 NUG1 CHZ1 RGI1 UTP7 LSM4 SPT2 BRR2 ECM32 SMC1 IES1 LOC1 SMC2 RSC8 PGD1 RNA15 MAD1 SUT1 NUP57 PRE9 ADE3 SDA1 ZUO1 SNF6 YCK1 SPO12 PRP8 DBP8 STH1 RRT14 ASG1 MHP1 MTR4 SCP160 RPB4 SWE1 ADO1 HOM6 MRT4 CSE4 MSN4 ELF1 KAE1 AIM2…	143	1976
chromosome structure [750.09]	0.000609798	HEK2 HHF1 AMN1 GBP2 SPT2 RSC8 ZUO1 STH1 HHT2	9	46
cytoplasm [725]	0.00343723	SSA1 PSK1 ATS1 RBG1 HEK2 SKT5 PRP6 LYS2 TPS1 AMN1 HIS7 HSM3 BSD2 SRO9 GLK1 APA1 KRR1 RPS14A RBK1 CTR86 LHP1 PMT5 TRM3 RPC53 STE7 PPH22 SEC31 NOP6 PHO13 PST2 CDC37 SEC7 RVB1 VPS64 SKP1 RPP2B SAC7 ADE8 RAD30 SNX41 SSN2 PSP1 EMI2 RBA50 GLC3 RGI1 LSM4 RTR1 UBP3 BRR2 ECM32 SMC1 BUD27 MET10 SMC2 RET2 HXK1 RNA15 RPL7A PCL10 RPL1B SUT1 SUA5 IMO32 COG2 CAF130 PRE9 BTN2 TIF4631 CRH1 ADE3 RPS0A SDA1 ENO1 ZU…	179	2879
transport vesicles [745]	0.00715437	SEC31 SEC7 RET2 VTI1 VPS21 APM1 SEC23	7	43
ER [735]	0.00723941	TIP1 ECM33 BSD2 PST2 FPR2 TIR1 RET2 ERG26 ERG4 OCH1 PRE9 GPI1 BGL2 ERG11 NCP1 BIG1 ERP5 YCK1 MNL1 SIM1 SCP160 MTC1 CIS3 SOP4 SED5 PER33 FRE1 STP3 HMG2 UBC7 EAR1 VTI1 HOR7 ALG12 OST3 VPS21 OST2 BFR1 YOP1 PIS1 VPS4 DPM1	42	537
inter-golgi transport vesicles [745.05]	0.00824797	SEC7 VTI1	2	3
MIPS Protein Complexes
Category	p-value	In Category from Cluster	k	f
Complex Number 149, probably RNA metabolism [550.1.149]	1.3979e-11	SPB1 LHP1 MAK21 SEC7 RPP2B NUG1 RTR1 LOC1 SDA1 RPF1 MRT4 DRS1 MDN1 RSA3 FPR4 RLP7 NOP15 KRE33 NOG2 NOP12 BRX1 NOC2 NOP4 BMS1	24	88
Complex Number 140, probably RNA metabolism [550.1.140]	6.95843e-09	SRO9 KRR1 LHP1 NOP6 MAK21 NUG1 TIF4631 DRS1 MDN1 RLP7 KRE33 NOP12 BRX1 NOC2 NOP4	15	46
Complex Number 446 [550.2.446]	4.30648e-07	GBP2 KRR1 NOP6 NPL3 NUG1 TIF4631 DRS1 ISA1 PWP1 RRP5 KRE33 KRI1 NOP12 NOC2	14	53
Complex Number 74 [550.2.74]	4.47611e-05	HHF1 GBP2 CDC37 NPL3 KRE33	5	9
Complex Number 6 [550.2.6]	4.97539e-05	KRR1 PWP1 KRE33 KRI1 BRX1 NOP4 APM1	7	20
Complex Number 204 [550.2.204]	7.41935e-05	TIF4631 DRS1 RRP5 KRI1 NOC2 NOP4	6	15
Complex Number 244 [550.2.244]	0.000147085	PRP6 TPS1 BRR2 ADE3 BAT1 SCP160 ADO1 DPS1 PGM2 LSP1	10	47
Complex Number 520 [550.2.520]	0.000163436	NUG1 GND1 MRT4 ACO1 FPR4 RLP7 NOP15 BRX1 NOC2	9	39
Complex Number 94 [550.2.94]	0.000163436	NUG1 GND1 MRT4 ACO1 FPR4 RLP7 NOP15 BRX1 NOC2	9	39
Complex Number 517 [550.2.517]	0.000319446	NPL3 TIF4631 KRE33 KRI1 NOP12 NOC2 NOP4	7	26
Complex Number 200 [550.2.200]	0.000319446	HHF1 LOC1 PWP1 KRE33 KRI1 NOP12 SEC23	7	26
Complex Number 125, probably protein/RNA transport [550.1.125]	0.000431351	SRO9 KRR1 NOP6 UTP4 RPP2B UTP7 PRE9 DBP8 ECM16 KRE33 NOP12 BMS1	12	73
Complex Number 144, probably RNA metabolism [550.1.144]	0.000461146	KRR1 NOP6 UTP4 RPP2B UTP7 PRE9 DBP8 ECM16 KRE33 BRX1 NOB1 NOC2 BMS1	13	84
Complex Number 40, Pwp1/Brx1/Nop12 (3) [550.3.40]	0.000582146	PWP1 NOP12 BRX1	3	4
Complex Number 56 [550.2.56]	0.00114794	HHF1 NUG1 TIF4631 PWP1 RRP5 KRE33 KRI1 NOP12 NOP4	9	50
Complex Number 17, Pab1 (1) [550.3.17]	0.00130375	TIF4631 MTR4 RRP5 NOC2	4	10
Complex Number 441 [550.2.441]	0.00139763	NUG1 NOP12 NOB1	3	5
Complex Number 142, probably RNA metabolism [550.1.142]	0.00166478	RBG1 HEK2 SRO9 LHP1 SUT1 TIF4631	6	25
Complex Number 106, probably protein synthesis turnover [550.1.106]	0.00196298	AMN1 TIF4631 ZUO1 SCP160	4	11
Complex Number 435 [550.2.435]	0.00233041	PPH22 PST2 YCK1 GND1 POR1 YCK2 APC1 VPS21	8	45
Complex Number 305 [550.2.305]	0.00268468	RRP5 POR1 VPS21	3	6
Complex Number 201 [550.2.201]	0.00282144	HHF1 NUG1 LOC1 NOP12	4	12
Complex Number 16, Ded1 (1) [550.3.16]	0.00282144	TMA64 TIF4631 MTR4 DED1	4	12
Complex Number 50, probably intermediate and energy metabolism [550.1.50]	0.00285037	ENO1 SSC1	2	2
Complex Number 339 [550.2.339]	0.00285037	SEC31 CRN1	2	2
Complex Number 436 [550.2.436]	0.00285037	YCK1 YCK2	2	2
Isocitrate dehydrogenase [250]	0.00285037	IDH1 IDH2	2	2
Complex Number 325 [550.2.325]	0.00285037	RVB1 RVB2	2	2
Complex Number 247 [550.2.247]	0.00285037	PSR1 WHI2	2	2
Complex Number 12, Sit4 (6) [550.3.12]	0.00451283	SAP190 RCK2 RAT1	3	7
Complex Number 137 [550.2.137]	0.00524001	HHF1 KRI1 HIR2 NOP4	4	14
Complex Number 534 [550.2.534]	0.00524001	HHF1 PSH1 NOB1 GAC1	4	14
Complex Number 375 [550.2.375]	0.00525449	UTP7 SPT2 TIF4631 GND1 NOP12	5	22
Complex Number 150 [550.2.150]	0.00525449	RVB1 UTP7 TIF4631 KRE33 BRX1	5	22
Complex Number 84 [550.2.84]	0.00693643	POR1 RVB2 DPM1	3	8
Complex Number 454 [550.2.454]	0.00693643	SKP1 PGM2 STI1	3	8
Complex Number 229, probably transcription/DNA maintanance/chromatin structure [550.1.229]	0.00693643	SMC1 PWP1 FPR4	3	8
Complex Number 142 [550.2.142]	0.00693643	ADO1 SAP190 POR1	3	8
rRNA splicing [440.30.20]	0.00776795	UTP4 NPL3 UTP7 DRS1 RAT1	5	24
Complex Number 13, U4/U6.U5 tri-snRNP (2) [550.3.13]	0.00824797	BRR2 PRP8	2	3
Complex Number 354 [550.2.354]	0.00824797	EMI2 SIW14	2	3
Complex Number 62, probably intermediate and energy metabolism [550.1.62]	0.00824797	PIM1 IDH2	2	3
Complex Number 91, probably protein synthesis turnover [550.1.91]	0.00824797	SSA1 RPB2	2	3
Complex Number 132 [550.2.132]	0.00827514	HHF1 NUG1 LOC1 SAP190 ACO1 MGE1 LSP1 SEC23	8	55
Complex Number 82 [550.2.82]	0.00842533	SPB1 SKP1 KRE33 KRI1 NOP12 BMS1	6	34
Complex Number 254 [550.2.254]	0.0099964	PWP1 BRX1 HEM15	3	9
MIPS Protein Classes
Category	p-value	In Category from Cluster	k	f
other ATPases [41.61]	0.00254171	SSA1 AFG1 SMC1 SMC2 CCT7 SSC1	6	27
DNA-dependent ATPases [41.41]	0.00390544	ECM32 STH1 PIF1 MOT1	4	13
H3 [112.31]	0.00824797	CSE4 HHT2	2	3
SMART Domains
Category	p-value	In Category from Cluster	k	f
<A href='http://smart.embl-heidelberg.de/smart/do_annotation.pl?DOMAIN=RRM&BLAST=DUMMY'>RRM</A>	0.000174521	GBP2 LHP1 NOP6 NPL3 RNA15 NOP15 WHI3 NOP12 NOP8 NOP4 MRD1	11	57
<A href='http://smart.embl-heidelberg.de/smart/do_annotation.pl?DOMAIN=t_SNARE&BLAST=DUMMY'>t_SNARE</A>	0.00524001	SEC9 SED5 VTI1 SSO1	4	14
<A href='http://smart.embl-heidelberg.de/smart/do_annotation.pl?DOMAIN=LA&BLAST=DUMMY'>LA</A>	0.00824797	SRO9 LHP1	2	3
<A href='http://smart.embl-heidelberg.de/smart/do_annotation.pl?DOMAIN=H3&BLAST=DUMMY'>H3</A>	0.00824797	CSE4 HHT2	2	3
<A href='http://smart.embl-heidelberg.de/smart/do_annotation.pl?DOMAIN=KH&BLAST=DUMMY'>KH</A>	0.0099964	HEK2 KRR1 SCP160	3	9
PFam-A Domains
Category	p-value	In Category from Cluster	k	f
<A href='http://pfam.sanger.ac.uk/family?id=RRM_1'>RRM_1</A>	0.000431348	GBP2 NPL3 RNA15 NOP15 WHI3 NOP12 NOP8 NOP4 MRD1	9	44
<A href='http://pfam.sanger.ac.uk/family?id=Glyco_transf_20'>Glyco_transf_20</A>	0.000582146	TPS1 TSL1 TPS3	3	4
<A href='http://pfam.sanger.ac.uk/family?id=Hexokinase_2'>Hexokinase_2</A>	0.000582146	GLK1 EMI2 HXK1	3	4
<A href='http://pfam.sanger.ac.uk/family?id=Hexokinase_1'>Hexokinase_1</A>	0.00139763	GLK1 EMI2 HXK1	3	5
<A href='http://pfam.sanger.ac.uk/family?id=Ribosomal_S7e'>Ribosomal_S7e</A>	0.00285037	RPS7B RPS7A	2	2
<A href='http://pfam.sanger.ac.uk/family?id=PfkB'>PfkB</A>	0.00285037	RBK1 ADO1	2	2
<A href='http://pfam.sanger.ac.uk/family?id=TIP49'>TIP49</A>	0.00285037	RVB1 RVB2	2	2
<A href='http://pfam.sanger.ac.uk/family?id=Flavodoxin_1'>Flavodoxin_1</A>	0.00451283	RFS1 PST2 NCP1	3	7
<A href='http://pfam.sanger.ac.uk/family?id=AAA_5'>AAA_5</A>	0.00684858	PIM1 MSP1 MDN1 VPS4	4	15
<A href='http://pfam.sanger.ac.uk/family?id=Ribosomal_L1'>Ribosomal_L1</A>	0.00824797	RPL1B RPL1A	2	3
<A href='http://pfam.sanger.ac.uk/family?id=FAD_binding_1'>FAD_binding_1</A>	0.00824797	MET10 NCP1	2	3
<A href='http://pfam.sanger.ac.uk/family?id=Trehalose_PPase'>Trehalose_PPase</A>	0.00824797	TSL1 TPS3	2	3
<A href='http://pfam.sanger.ac.uk/family?id=La'>La</A>	0.00824797	SRO9 LHP1	2	3
Yeast Two Hybrid - Uetz
Category	p-value	In Category from Cluster	k	f
Yeast Two Hybrid - Ito (core)
Category	p-value	In Category from Cluster	k	f
YCR052W (RSC6)	0.00285037	RSC8 MGE1	2	2
YNL086W	0.00824797	COG2 BLI1	2	3
Yeast Two Hybrid - Ito (full)
Category	p-value	In Category from Cluster	k	f
YGR250C	0.00285037	RBG1 HOF1	2	2
YCL040W (GLK1)	0.00285037	GLK1 EMI2	2	2
YGR092W (DBF2)	0.00824797	MOB1 BLI1	2	3
Synthetic Genetic Array Analysis
Category	p-value	In Category from Cluster	k	f
YBR234C (ARC40)	0.00104999	SKT5 CHS3 CPR7 CHS5 ARC18 MYO5 BNI4 SHE4	8	40
YDL029W (ARP2)	0.00200753	SKT5 CHS3 SRO9 SAC7 CPR7 CHS5 BNI4 SHE4	8	44
YNL271C (BNI1)	0.00520851	ATS1 SKT5 CHS3 NUM1 SWE1 CHS5 BNI4 PCL1	8	51
MDS Proteomics Complexes
Category	p-value	In Category from Cluster	k	f
YDL213C (FYV14)	2.218e-06	GBP2 KRR1 NPL3 NUG1 TIF4631 DRS1 ISA1 PWP1 RRP5 KRE33 KRI1 NOP12 NOC2	13	52
YKL139W (CTK1)	2.0805e-05	HHF1 GBP2 CDC37 NPL3 KRE33	5	8
YNL175C (NOP13)	4.66023e-05	TIF4631 DRS1 RRP5 KRI1 NOC2 NOP4	6	14
YMR049C (ERB1)	0.000131834	NUG1 GND1 MRT4 ACO1 FPR4 RLP7 NOP15 BRX1 NOC2	9	38
YDR386W (MUS81)	0.000164263	HHF1 NUG1 LOC1 PWP1 KRE33 KRI1 NOP12 SEC23	8	31
YLR427W	0.000244525	NPL3 TIF4631 KRE33 KRI1 NOP12 NOC2 NOP4	7	25
YPL259C (APM1)	0.000335023	KRR1 PWP1 KRE33 KRI1 BRX1 NOP4	6	19
YDL060W (TSR1)	0.000582146	NUG1 NOP12 NOB1	3	4
YBR055C (PRP6)	0.000609798	TPS1 BRR2 ADE3 BAT1 SCP160 ADO1 DPS1 PGM2 LSP1	9	46
YIL035C (CKA1)	0.000986815	HHF1 NUG1 TIF4631 PWP1 RRP5 KRE33 KRI1 NOP12 NOP4	9	49
YNL090W (RHO2)	0.00139763	RRP5 POR1 VPS21	3	5
YDR225W (HTA1)	0.00390544	HHF1 KRI1 HIR2 NOP4	4	13
YER179W (DMC1)	0.00451283	POR1 RVB2 DPM1	3	7
YDR306C	0.00451283	SKP1 PGM2 STI1	3	7
YNL106C (INP52)	0.00451283	ADO1 SAP190 POR1	3	7
YMR106C (YKU80)	0.00528646	TPS1 PST2 APT1 SIS1 IDH1 POR1 NOG2 STI1 DPB2	9	62
YOR080W (DIA2)	0.00725703	SPB1 SKP1 KRE33 KRI1 NOP12 BMS1	6	33
YHR135C (YCK1)	0.00812809	PPH22 PST2 GND1 POR1 YCK2 APC1 VPS21	7	44
YML029W (USA1)	0.00824797	PIM1 MDN1	2	3
YIR034C (LYS1)	0.00824797	TAL1 POR1	2	3
YGR054W	0.00824797	NPL3 KRE33	2	3
YER075C (PTP3)	0.00824797	HHF1 RRP5	2	3
YBR109C (CMD1)	0.00929374	PST2 SPC110 PGM2 MYO5 SHE4	5	25
YNL311C	0.0099964	RVB1 SKP1 STI1	3	9
YIR001C (SGN1)	0.0099964	NPL3 SPT2 TIF4631	3	9
YHR052W (CIC1)	0.0099964	RRP5 KRE33 NOC2	3	9
YDR247W	0.0099964	SKT5 TPS1 NUM1	3	9
Cellzome Complexes
Category	p-value	In Category from Cluster	k	f
YNL110C (NOP15)	3.27105e-08	SPB1 MAK21 NUG1 SDA1 RPF1 DRS1 MDN1 RLP7 NOP15 BRX1 NOP4	11	26
YPL043W (NOP4)	1.68246e-07	MAK21 NUG1 DRS1 MDN1 RLP7 KRE33 NOP12 BRX1 NOC2 NOP4	10	24
YLR074C (BUD20)	2.77288e-06	LHP1 NUG1 SDA1 MRT4 MDN1 RLP7 NOP15 NOG2	8	19
YDR060W (MAK21)	3.06969e-06	MAK21 RPP2B RSA3 RLP7 NOP15 NOP12 BRX1 NOC2 NOP4	9	25
YER126C (NSA2)	4.66023e-05	NUG1 SDA1 MRT4 RLP7 NOG2 NOC2	6	14
YNL061W (NOP2)	5.58087e-05	MAK21 NUG1 LOC1 RPF1 MRT4 DRS1 FPR4 BMS1	8	27
YKR081C (RPF2)	0.0001134	MAK21 NUG1 RTR1 NOP15 NOG2 NOC2	6	16
YGR245C (SDA1)	0.00081642	NUG1 SDA1 MDN1 RLP7 NOG2	5	15
YMR049C (ERB1)	0.00130375	RLP7 NOP15 BRX1 NOC2	4	10
YHR066W (SSF1)	0.00132392	MAK21 RPF1 DRS1 RLP7 NOC2 NOP4	6	24
YER082C (UTP7)	0.00264809	UTP4 UTP7 KRE33 BMS1 MRD1	5	19
YGR254W (ENO1)	0.00285037	ENO1 SSC1	2	2
YDR404C (RPB7)	0.00390544	RPO21 RPB4 SPT5 RPB2	4	13
YGR285C (ZUO1)	0.00451283	TIF4631 ZUO1 SCP160	3	7
YGL099W (LSG1)	0.00525449	KRR1 UTP7 ECM16 KRE33 BMS1	5	22
YGR162W (TIF4631)	0.00684858	RBG1 SRO9 LHP1 TIF4631	4	15
YLR196W (PWP1)	0.00693643	SMC1 PWP1 FPR4	3	8
YJL074C (SMC3)	0.00693643	SMC1 NOP12 RVB2	3	8
YBR236C (ABD1)	0.00824797	SPT5 RPB2	2	3
YBR158W (CST13)	0.00824797	AMN1 ZUO1	2	3
YBL022C (PIM1)	0.00824797	PIM1 IDH2	2	3
YAL005C (SSA1)	0.00824797	SSA1 RPB2	2	3
Proteome Localization--Observed
Category	p-value	In Category from Cluster	k	f
nucleus	0.00164136	AMN1 TOS1 RPO21 CDC37 UTP4 NPL3 NUG1 UTP7 LSM4 SPT2 BRR2 LOC1 RSC8 PGD1 NUP57 STH1 RRT14 MRT4 ELF1 DRS1 MDN1 FPR4 VPS71 PIF1 ECM16 RRP5 RLP7 HHT2 NOP15 ORC5 KRI1 PFA4 TRM10 NOP8 NOB1 NOC2 CWC27 MOT1 JIP5	39	450
nuclear rim / ER	0.00557496	OCH1 BGL2 ERG11 YCK1 SIM1 SOP4 HMG2 UBC7 VTI1 HOR7 ALG12 VPS21 YOP1	13	110
Proteome Localization--Predicted+Observed
Category	p-value	In Category from Cluster	k	f
nuc	0.000418157	NCL1 HHF1 PRP6 AMN1 TOS1 AME1 KRR1 RTK1 RPO21 RPC53 NOP6 CDC37 NGG1 CFT1 UTP4 SKP1 SPC110 SAC7 TRS120 NPL3 PKH1 PSP1 NUG1 CHZ1 UTP7 LSM4 SPT2 BRR2 ECM32 SMC1 IES1 LOC1 SMC2 RSC8 PGD1 RNA15 MAD1 SUT1 SEC9 VHT1 NUP57 BTN2 SDA1 ZUO1 SNF6 RPF1 CRP1 SPO12 PRP8 DBP8 STH1 RRT14 MHP1 MTR4 RPB4 MRT4 TTI1 CSE4 MSN4 ELF1 DRE2 MLP1 DRS1 STU2 MDN1 ECM22 STT4 STP3 FPR4 SPT5 VPS71 HOF1 MYO5 ECM16 CEP3 RRP5 RLP7…	103	1432
Deletions Consortium (Essentiality, Morphology)
Category	p-value	In Category from Cluster	k	f
essential	2.27041e-08	PRP6 AME1 ARC40 SPB1 KRR1 CTR86 RPO21 RPC53 SEC31 MAK21 CDC37 SEC7 RVB1 HEM1 CFT1 UTP4 SKP1 SPC110 TRS120 RBA50 NUG1 UTP7 LSM4 BRR2 SMC1 SMC2 RSC8 RET2 ERG26 RNA15 SUA5 VRG4 SEC9 VHT1 NUP57 COG2 GPI1 SDA1 ERG11 MYO1 NCP1 RPF1 BIG1 MOB1 STH1 MTR4 CCT7 KRE9 ILV3 SSC1 TTI1 CSE4 YKT6 KAE1 DRE2 DRS1 DPS1 SED5 STU2 MDN1 PWP1 STT4 SPT5 ECM16 CEP3 VTI1 RRP5 RLP7 SIS1 NOP15 KRE33 APC1 ORC5 KRI1 NOG2 BRX1 …	99	1099
Yeast Fitness Data
Category	p-value	In Category from Cluster	k	f
Published Complexes
Category	p-value	In Category from Cluster	k	f
Andersen et al. (2002) - Curr Bio 12:1-	2.11882e-09	KRR1 MAK21 UTP7 BRR2 SMC1 RPL7A RPL1B PHB1 RPS0A SDA1 RPF1 PRP8 DBP8 MTR4 SSC1 TOR1 MRT4 DRS1 PWP1 ARC18 RPS16A RRP5 RPL9B KRE33 NOG2 DED1 NOC2 NOP4 BMS1 MRD1	30	165
Bassler et al. (2001) - Mol Cell 8:517-	6.40055e-06	SPB1 NUG1 SDA1 MRT4 MDN1 RLP7 NOG2 NOC2 BMS1	9	27
Harnicharnpai et al. (2001) - Mol Cell 8:505-	5.13056e-05	SSA1 SPB1 LOC1 RPF1 MRT4 DRS1 RLP7 NOP15 BRX1	9	34

## Sheet: GO fpr3fpr4 UP (62 genes)
Genes Entered to Funspec: 62 (from Figure 4B)
Input Cluster (n=60)
Genes Not Found:
COM2
MPC2
GO Molecular Function
Category	p-value	In Category from Cluster	k	f
structural constituent of ribosome [GO:0003735]	5.07232e-08	RPL23A RPS13 RPS17B RPL23B RPL30 RPL26B RPS4A RPL14A RPS21A RPL38 RPL21B RPS9A RPS23B	13	218
inorganic phosphate transmembrane transporter activity [GO:0005315]	7.04306e-06	PHO89 PIC2 PHO84	3	5
acid phosphatase activity [GO:0003993]	5.76453e-05	PHO11 PHO5 PHO12	3	9
phosphatase activity [GO:0016791]	0.000123481	PHO11 PHO5 PHO8 PHO12	4	29
GDP binding [GO:0019003]	0.00024219	TEF2 TEF1	2	3
spermine transmembrane transporter activity [GO:0000297]	0.000481544	TPO2 TPO3	2	4
ion channel activity [GO:0005216]	0.00219513	YRO2 HSP30	2	8
antiporter activity [GO:0015297]	0.00593886	TPO2 TPO3	2	13
fructose transmembrane transporter activity [GO:0005353]	0.00790191	HXT3 HXT4	2	15
mannose transmembrane transporter activity [GO:0015578]	0.00790191	HXT3 HXT4	2	15
translation elongation factor activity [GO:0003746]	0.00897829	TEF2 TEF1	2	16
nucleotide phosphatase activity [GO:0019204]	0.00908678	PHO8	1	1
acireductone synthase activity [GO:0043874]	0.00908678	UTR4	1	1
ATP phosphoribosyltransferase activity [GO:0003879]	0.00908678	HIS1	1	1
stearoyl-CoA 9-desaturase activity [GO:0004768]	0.00908678	OLE1	1	1
oxidoreductase activity, acting on paired donors, with oxidation of a pair of donors resulting in the reduction of molecular oxygen to two molecules of water [GO:0016717]	0.00908678	OLE1	1	1
cyclosporin A binding [GO:0016018]	0.00908678	CPR1	1	1
polyphosphate kinase activity [GO:0008976]	0.00908678	VTC4	1	1
dihydroorotate oxidase activity [GO:0004158]	0.00908678	URA1	1	1
dihydroorotate dehydrogenase activity [GO:0004152]	0.00908678	URA1	1	1
ATP-dependent protein binding [GO:0043008]	0.00908678	UBI4	1	1
3'(2'),5'-bisphosphate nucleotidase activity [GO:0008441]	0.00908678	MET22	1	1
glycogen phosphorylase activity [GO:0008184]	0.00908678	GPH1	1	1
phosphorylase activity [GO:0004645]	0.00908678	GPH1	1	1
sodium:inorganic phosphate symporter activity [GO:0015319]	0.00908678	PHO89	1	1
GO Biological Process
Category	p-value	In Category from Cluster	k	f
translation [GO:0006412]	9.26825e-08	RPL23A TEF2 RPS13 RPS17B RPL23B RPL30 RPL26B RPS4A RPL14A RPS21A RPL38 RPL21B RPS9A TEF1 RPS23B	15	318
polyphosphate metabolic process [GO:0006797]	4.19762e-07	VTC1 VTC4 PHO84 VTC3	4	8
phosphate transport [GO:0006817]	1.24226e-06	PHO89 PIC2 PHO86 PHO84	4	10
phosphate metabolic process [GO:0006796]	3.86804e-05	PHO11 PHO5 PHO81	3	8
microautophagy [GO:0016237]	8.18181e-05	VTC1 VTC4 VTC3	3	10
vacuole fusion, non-autophagic [GO:0042144]	0.000123481	VTC1 TRX2 VTC4 VTC3	4	29
dephosphorylation [GO:0016311]	0.00018319	PHO11 PHO5 PHO8 PHO12	4	32
vacuolar transport [GO:0007034]	0.00036726	VTC1 VTC4 VTC3	3	16
spermine transport [GO:0000296]	0.000481544	TPO2 TPO3	2	4
sulfate assimilation [GO:0000103]	0.00423686	TRX2 MET22	2	11
transmembrane transport [GO:0055085]	0.00572089	PHO89 HXT3 PIC2 TPO2 HXT4 PHO84 ECM3 TPO3	8	303
fungal-type cell wall organization [GO:0031505]	0.00589634	PRS4 PST1 MKC7 HPF1 ECM3	5	128
hexose transport [GO:0008645]	0.00688837	HXT3 HXT4	2	14
negative regulation of nuclear mRNA splicing, via spliceosome [GO:0048025]	0.00908678	RPL30	1	1
unsaturated fatty acid biosynthetic process [GO:0006636]	0.00908678	OLE1	1	1
positive regulation of transcription from RNA polymerase II promoter involved in unfolded protein response [GO:0006990]	0.00908678	HAC1	1	1
response to temperature stimulus [GO:0009266]	0.00908678	SPL2	1	1
regulation of phosphate transport [GO:0010966]	0.00908678	PHO86	1	1
cell wall assembly [GO:0070726]	0.00908678	YGP1	1	1
hyperosmotic salinity response [GO:0042538]	0.00908678	MET22	1	1
nicotinamide nucleotide metabolic process [GO:0046496]	0.00908678	PHO8	1	1
GO Cellular Component
Category	p-value	In Category from Cluster	k	f
ribosome [GO:0005840]	6.61154e-08	RPL23A TEF2 RPS13 RPS17B RPL23B RPL30 RPL26B RPS4A RPL14A RPS21A RPL38 RPL21B RPS9A TEF1 RPS23B	15	310
ribonucleoprotein complex [GO:0030529]	4.09794e-07	RPL23A RPS13 SNU56 RPS17B RPL23B RPL30 RPL26B RPS4A RPL14A RPS21A RPL38 RPL21B RPS9A RPS23B	14	307
vacuolar transporter chaperone complex [GO:0033254]	2.83558e-06	VTC1 VTC4 VTC3	3	4
intracellular [GO:0005622]	5.41317e-06	STP4 RPS13 RPS17B HIS1 RPL30 MIG2 RPL26B RPS4A RPL14A RPS21A RPL38 RPL21B RPS9A RPS23B	14	381
cytosolic large ribosomal subunit [GO:0022625]	1.27859e-05	RPL23A RPL23B RPL30 RPL26B RPL14A RPL38 RPL21B	7	88
cytosolic small ribosomal subunit [GO:0022627]	1.80695e-05	RPS13 RPS17B RPS4A RPS21A RPS9A RPS23B	6	62
intrinsic to vacuolar membrane [GO:0031310]	8.12057e-05	VTC1 VTC4	2	2
extracellular region [GO:0005576]	0.000202579	PHO11 PHO5 PST1 SPI1 YGP1 HPF1	6	95
eukaryotic translation elongation factor 1 complex [GO:0005853]	0.000797879	TEF2 TEF1	2	5
fungal-type cell wall [GO:0009277]	0.000983833	PHO5 PST1 MKC7 SPI1 HPF1	5	85
anchored to membrane [GO:0031225]	0.00218503	PST1 MKC7 SPI1 HPF1	4	61
cytoplasm [GO:0005737]	0.00299794	PRS4 RPL23A TEF2 STP4 RPS13 CPR1 RPS17B PHO8 UTR4 HIS1 HMF1 RPL23B RPL30 RPL26B TRX2 PHO81 SPL2 RPS4A RPL14A PRR1 URA1 RPS21A UBI4 RPL38 RGS2 RPS9A TEF1 RPS23B GPH1	29	2026
small ribosomal subunit [GO:0015935]	0.00688837	RPS9A RPS23B	2	14
MIPS Functional Classification
Category	p-value	In Category from Cluster	k	f
ribosomal proteins [12.01.01]	2.10433e-07	RPL23A RPS13 RPS17B RPL23B RPL30 RPL26B RPS4A RPL14A RPS21A RPL38 RPL21B RPS9A RPS23B	13	246
phosphate transport [20.01.01.07.07]	1.93888e-06	PHO89 PIC2 PHO86 PHO84	4	11
homeostasis of phosphate [34.01.03.03]	5.76453e-05	PHO89 PHO86 PHO84	3	9
vacuole or lysosome [42.25]	0.000637567	VTC1 TRX2 VTC4 VTC3	4	44
stress response [32.01]	0.00333075	YRO2 HSP30 CPR1 HMF1 UBI4 YGP1	6	162
amine / polyamine transport [20.01.11]	0.00688837	TPO2 TPO3	2	14
biosynthesis of histidine [01.01.09.07.01]	0.00790191	PRS4 HIS1	2	15
sodium driven symporter [20.03.02.02.02]	0.00908678	PHO89	1	1
MIPS Phenotypes
Category	p-value	In Category from Cluster	k	f
other stress response defects [62.99]	0.00280584	HSP30 UBI4	2	9
MIPS Subcellular Localization
Category	p-value	In Category from Cluster	k	f
vacuole [770]	0.000165799	PHO11 PHO5 MKC7 HXT3 PHO8 PIC2 SPI1 PHO12 VTC3	9	224
vacuolar membrane [770.01]	0.000240238	PHO8 VTC1 TPO2 VTC4 VTC3 TPO3	6	98
plasma membrane [720]	0.00129034	HSP30 PST1 MKC7 HXT3 VTC1 HXT4 PHO84	7	184
extracellular [701]	0.00129409	PHO11 PHO5 PHO12 YGP1	4	53
cytoplasm [725]	0.00354254	PRS4 RPL23A TEF2 STP4 RPS13 CPR1 RPS17B PHO8 UTR4 HMF1 RPL23B SPI1 HAC1 RPL30 OLE1 MIG2 RPL26B TRX2 PHO81 SPL2 VTC4 RPS4A RPL14A PRR1 URA1 RPS21A UBI4 RPL38 YGP1 MET22 HPF1 RGS2 RPL21B RPS9A TEF1 RPS23B GPH1	37	2879
MIPS Protein Complexes
Category	p-value	In Category from Cluster	k	f
cytoplasmic ribosomal large subunit [500.40.10]	7.35828e-06	RPL23A RPL23B RPL30 RPL26B RPL14A RPL38 RPL21B	7	81
cytoplasmic ribosomal small subunit [500.40.20]	1.10481e-05	RPS13 RPS17B RPS4A RPS21A RPS9A RPS23B	6	57
eEF1 [500.20.10]	0.00118982	TEF2 TEF1	2	6
Complex Number 329 [550.2.329]	0.00165602	UBI4 PHO84	2	7
Complex Number 413 [550.2.413]	0.00280584	HMF1 UBI4	2	9
Complex Number 119 [550.2.119]	0.00593886	CPR1 UBI4	2	13
MIPS Protein Classes
Category	p-value	In Category from Cluster	k	f
Major facilitator superfamily proteins (MFS) [121]	0.00159466	PHO89 HXT3 TPO2 HXT4 PHO84 TPO3	6	140
GTP-binding proteins involved in protein synthesis [61.31]	0.00897829	TEF2 TEF1	2	16
SMART Domains
Category	p-value	In Category from Cluster	k	f
<A href='http://smart.embl-heidelberg.de/smart/do_annotation.pl?DOMAIN=KOW&BLAST=DUMMY'>KOW</A>	0.00118982	RPL26B RPS4A	2	6
<A href='http://smart.embl-heidelberg.de/smart/do_annotation.pl?DOMAIN=S4&BLAST=DUMMY'>S4</A>	0.00219513	RPS4A RPS9A	2	8
<A href='http://smart.embl-heidelberg.de/smart/do_annotation.pl?DOMAIN=alkPPc&BLAST=DUMMY'>alkPPc</A>	0.00908678	PHO8	1	1
PFam-A Domains
Category	p-value	In Category from Cluster	k	f
<A href='http://pfam.sanger.ac.uk/family?id=Acid_phosphat_A'>Acid_phosphat_A</A>	1.39949e-05	PHO11 PHO5 PHO12	3	6
<A href='http://pfam.sanger.ac.uk/family?id=Sugar_tr'>Sugar_tr</A>	2.086e-05	HXT3 TPO2 HXT4 PHO84 TPO3	5	38
<A href='http://pfam.sanger.ac.uk/family?id=SPX'>SPX</A>	8.18181e-05	PHO81 VTC4 VTC3	3	10
<A href='http://pfam.sanger.ac.uk/family?id=Ribosomal_L14'>Ribosomal_L14</A>	0.00024219	RPL23A RPL23B	2	3
<A href='http://pfam.sanger.ac.uk/family?id=Bac_rhodopsin'>Bac_rhodopsin</A>	0.00024219	YRO2 HSP30	2	3
<A href='http://pfam.sanger.ac.uk/family?id=VTC'>VTC</A>	0.00024219	VTC4 VTC3	2	3
<A href='http://pfam.sanger.ac.uk/family?id=GTP_EFTU_D3'>GTP_EFTU_D3</A>	0.000481544	TEF2 TEF1	2	4
<A href='http://pfam.sanger.ac.uk/family?id=MFS_1'>MFS_1</A>	0.000589767	HXT3 TPO2 HXT4 PHO84 TPO3	5	76
<A href='http://pfam.sanger.ac.uk/family?id=S4'>S4</A>	0.00118982	RPS4A RPS9A	2	6
<A href='http://pfam.sanger.ac.uk/family?id=GTP_EFTU_D2'>GTP_EFTU_D2</A>	0.00688837	TEF2 TEF1	2	14
<A href='http://pfam.sanger.ac.uk/family?id=GTP_EFTU'>GTP_EFTU</A>	0.00897829	TEF2 TEF1	2	16
<A href='http://pfam.sanger.ac.uk/family?id=Ribosomal_S13_N'>Ribosomal_S13_N</A>	0.00908678	RPS13	1	1
<A href='http://pfam.sanger.ac.uk/family?id=Alk_phosphatase'>Alk_phosphatase</A>	0.00908678	PHO8	1	1
<A href='http://pfam.sanger.ac.uk/family?id=HisG'>HisG</A>	0.00908678	HIS1	1	1
<A href='http://pfam.sanger.ac.uk/family?id=HisG_C'>HisG_C</A>	0.00908678	HIS1	1	1
<A href='http://pfam.sanger.ac.uk/family?id=DUF202'>DUF202</A>	0.00908678	VTC1	1	1
<A href='http://pfam.sanger.ac.uk/family?id=DUF2432'>DUF2432</A>	0.00908678	POF1	1	1
<A href='http://pfam.sanger.ac.uk/family?id=FA_desaturase'>FA_desaturase</A>	0.00908678	OLE1	1	1
<A href='http://pfam.sanger.ac.uk/family?id=DHO_dh'>DHO_dh</A>	0.00908678	URA1	1	1
<A href='http://pfam.sanger.ac.uk/family?id=Ribosomal_L38e'>Ribosomal_L38e</A>	0.00908678	RPL38	1	1
<A href='http://pfam.sanger.ac.uk/family?id=Phosphorylase'>Phosphorylase</A>	0.00908678	GPH1	1	1
<A href='http://pfam.sanger.ac.uk/family?id=PHO4'>PHO4</A>	0.00908678	PHO89	1	1
Yeast Two Hybrid - Uetz
Category	p-value	In Category from Cluster	k	f
Yeast Two Hybrid - Ito (core)
Category	p-value	In Category from Cluster	k	f
Yeast Two Hybrid - Ito (full)
Category	p-value	In Category from Cluster	k	f
YLR453C (RIF2)	0.00485572	PHO11 HSP30 MKC7 PHO12	4	76
YHR114W (BZZ1)	0.00880306	RPL23B RPL30 VTC4 PHO86	4	90
YHL026C	0.00908678	MET22	1	1
YDR105C	0.00908678	YGP1	1	1
YLR203C (MSS51)	0.00908678	VTC3	1	1
YLR297W	0.00908678	TPO3	1	1
YDL093W (PMT5)	0.00908678	OLE1	1	1
YMR246W (FAA4)	0.00908678	SPL2	1	1
YNL034W	0.00908678	RPS4A	1	1
YNL327W (EGT2)	0.00908678	UBI4	1	1
YOR040W (GLO4)	0.00908678	YRO2	1	1
YBR285W	0.00908678	TPO3	1	1
Synthetic Genetic Array Analysis
Category	p-value	In Category from Cluster	k	f
MDS Proteomics Complexes
Category	p-value	In Category from Cluster	k	f
YDL190C (UFD2)	0.00219513	HMF1 UBI4	2	8
YJR090C (GRR1)	0.00505461	CPR1 UBI4	2	12
YDR510W (SMT3)	0.00908678	CPR1	1	1
YFL014W (HSP12)	0.00908678	CPR1	1	1
YDR419W (RAD30)	0.00908678	GPH1	1	1
YKR055W (RHO4)	0.00908678	URA1	1	1
YDR313C (PIB1)	0.00908678	UBI4	1	1
Cellzome Complexes
Category	p-value	In Category from Cluster	k	f
Proteome Localization--Observed
Category	p-value	In Category from Cluster	k	f
Proteome Localization--Predicted+Observed
Category	p-value	In Category from Cluster	k	f
cyt	7.01111e-05	PRS4 RPL23A TEF2 POF1 RPS13 MKC7 CPR1 HXT3 RPS17B UTR4 PIC2 HIS1 HMF1 VTC1 RPL23B SPI1 RPL30 OLE1 RPL26B TPO2 TRX2 PHO81 HXT4 SPL2 VTC4 PHO86 RPS4A RPL14A PRR1 URA1 RPS21A UBI4 RPL38 PHO84 MET22 HPF1 RGS2 VTC3 RPL21B RPS9A TEF1 RPS23B TPO3 GPH1	44	3195
Deletions Consortium (Essentiality, Morphology)
Category	p-value	In Category from Cluster	k	f
Yeast Fitness Data
Category	p-value	In Category from Cluster	k	f
Published Complexes
Category	p-value	In Category from Cluster	k	f

## Sheet: GO fpr3fpr4 DOWN (65 genes)
Genes Entered to Funspec:65 ( Figure 4B)
Input Cluster (n=65)
GO Molecular Function (1646 categories)
Category	p-value	In Category from Cluster	k	f
siderophore transmembrane transporter activity [GO:0015343]	9.543e-05	ARN1 ARN2	2	2
protein serine/threonine kinase activity [GO:0004674]	0.001193	PKC1 KSS1 KSP1 KIC1 HAL5 HSL1	6	122
protein kinase activity [GO:0004672]	0.00141	PKC1 KSS1 KSP1 KIC1 HAL5 HSL1	6	126
Rab GTPase activator activity [GO:0005097]	0.004956	GYP7 GYL1	2	11
GTPase activator activity [GO:0005096]	0.009625	GYP7 LRG1 GLO3	3	45
syntaxin binding [GO:0019905]	0.009844	SLY1	1	1
peroxisome matrix targeting signal-1 binding [GO:0005052]	0.009844	PEX5	1	1
siderophore uptake transmembrane transporter activity [GO:0015344]	0.009844	SIT1	1	1
carnitine transporter activity [GO:0015226]	0.009844	AGP2	1	1
myosin I binding [GO:0017024]	0.009844	BBC1	1	1
tripeptide transporter activity [GO:0042937]	0.009844	PTR2	1	1
protein kinase C activity [GO:0004697]	0.009844	PKC1	1	1
GO Biological Process (2062 categories)
Category	p-value	In Category from Cluster	k	f
siderophore transport [GO:0015891]	4.329e-09	SIT1 ARN1 ARN2 FIT2 FIT3	5	8
iron ion homeostasis [GO:0055072]	4.435e-06	SIT1 ARN1 ARN2 FIT2 FIT3	5	26
transport [GO:0006810]	0.00178	AGP2 SLY1 PEX5 PDR15 SIT1 GLO3 ARN1 ARN2 GGA2 SEC28 PTR2 NUP2 YMD8 NUP1 PDR5 FIT2 FIT3	17	815
protein phosphorylation [GO:0006468]	0.001861	PKC1 KSS1 KSP1 KIC1 HAL5 HSL1	6	133
vesicle-mediated transport [GO:0016192]	0.002413	RCR1 GYP7 SLY1 PIB2 GGA2 SEC28	6	140
retrograde vesicle-mediated transport, Golgi to ER [GO:0006890]	0.002502	SLY1 GLO3 SEC28	3	28
transcription-dependent tethering of RNA polymerase II gene DNA at nuclear periphery [GO:0000972]	0.002572	NUP2 NUP1	2	8
response to osmotic stress [GO:0006970]	0.002771	AGP2 MSB2 SKN7	3	29
ion transport [GO:0006811]	0.003886	SIT1 ARN1 ARN2 FIT2 FIT3	5	107
signal transduction involved in filamentous growth [GO:0001402]	0.004081	MSB2 KSS1	2	10
positive regulation of Rab GTPase activity [GO:0032851]	0.004956	GYP7 GYL1	2	11
positive regulation of GTPase activity [GO:0043547]	0.006464	GYP7 LRG1 GLO3	3	39
regulation of Rab GTPase activity [GO:0032313]	0.00694	GYP7 GYL1	2	13
ER to Golgi vesicle-mediated transport [GO:0006888]	0.007731	SLY1 GLO3 SEC28 GYL1	4	80
fungal-type cell wall organization [GO:0031505]	0.00826	SLA1 PKC1 RCR1 KIC1 SRL1	5	128
intracellular signal transduction [GO:0035556]	0.009225	PKC1 IML1	2	15
regulation of transcription, DNA-dependent [GO:0006355]	0.009826	CCR4 TEC1 UPC2 SUM1 SPT6 SKN7 RSC4 SOK2 CAF120 AZF1 HHO1	11	507
COPI coating of Golgi vesicle [GO:0048205]	0.009844	GLO3	1	1
siderophore metabolic process [GO:0009237]	0.009844	ARN2	1	1
vesicle coating [GO:0006901]	0.009844	SEC28	1	1
tripeptide transport [GO:0042939]	0.009844	PTR2	1	1
phosphatidylcholine catabolic process [GO:0034638]	0.009844	NTE1	1	1
meiotic sister chromatid separation [GO:0051757]	0.009844	SGO1	1	1
positive regulation of maintenance of meiotic sister chromatid cohesion [GO:0034096]	0.009844	SGO1	1	1
response to carbohydrate stimulus [GO:0009743]	0.009844	AZF1	1	1
maturation of 5S rRNA [GO:0000481]	0.009844	SNU66	1	1
negative regulation of chromatin silencing [GO:0031936]	0.009844	HHO1	1	1
carnitine transport [GO:0015879]	0.009844	AGP2	1	1
GO Cellular Component (625 categories)
Category	p-value	In Category from Cluster	k	f
cytoplasmic membrane-bounded vesicle [GO:0016023]	7.333e-05	SIT1 ARN1 ARN2	3	9
membrane [GO:0016020]	0.001275	SLA1 RCR1 CSG2 AGP2 MTC5 SLY1 UPC2 PEX5 PDR15 SIT1 PIB2 MNT2 ARN1 ARN2 SEC28 AIM19 FAR1 IML1 PTR2 PSR2 NUP2 YMD8 NTE1 CHS1 NUP1 PDR5 FIT2 FIT3	28	1671
extrinsic to fungal-type vacuolar membrane [GO:0097042]	0.001395	MTC5 IML1	2	6
integral to plasma membrane [GO:0005887]	0.00159	AGP2 MSB2 PTR2	3	24
endosome membrane [GO:0010008]	0.002285	SLA1 SIT1 ARN1 ARN2	4	57
Seh1-associated complex [GO:0035859]	0.002572	MTC5 IML1	2	8
COPI vesicle coat [GO:0030126]	0.002572	GLO3 SEC28	2	8
endosome [GO:0005768]	0.004044	SLA1 SIT1 ARN1 ARN2 SEC28	5	108
COPI coated vesicle membrane [GO:0030663]	0.004081	SEC28 YMD8	2	10
site of polarized growth [GO:0030427]	0.004956	PKC1 MSB2	2	11
COPI-coated vesicle [GO:0030137]	0.00591	GLO3 YMD8	2	12
cell surface [GO:0009986]	0.009844	SRL1	1	1
MIPS Functional Classification (459 categories)
Category	p-value	In Category from Cluster	k	f
siderophore-iron transport [20.01.01.01.01.01]	0.000188	SIT1 ARN1 ARN2	3	12
drug/toxin transport [20.01.27]	0.0005432	SIT1 ARN1 ARN2 PDR5	4	39
budding, cell polarity and filament formation [43.01.03.05]	0.0008478	SLA1 PKC1 TEC1 MSB2 KSS1 FAR1 BUD4 HSL1 SOK2 CHS1	10	312
detoxification [32.07]	0.001077	SIT1 ARN1 ARN2 PDR5 SRL1	5	80
ion transport [20.01.01]	0.001941	FIT2 FIT3	2	7
modification by phosphorylation, dephosphorylation, autophosphorylation [14.07.03]	0.002201	PKC1 KSS1 RTS3 KSP1 HAL5 HSL1 PSR2	7	186
GTPase activator (GAP) [18.02.01.01.01]	0.003684	GYP7 LRG1 GLO3	3	32
ER to Golgi transport [20.09.07.03]	0.004822	SLY1 GLO3 SEC28 GYL1	4	70
mitotic cell cycle and cell cycle control [10.03.01]	0.004929	PKC1 GLO3 RPN12 CLG1 KIC1 SKN7 CLN1	7	215
transcriptional control [11.02.03.04]	0.008193	CCR4 TEC1 ASF2 UPC2 GLO3 SPT6 SKN7 SOK2 CAF120 HHO1	10	426
MIPS Phenotypes (142 categories)
Category	p-value	In Category from Cluster	k	f
Staurosporine sensitivity [92.60]	0.001941	CCR4 PKC1	2	7
G1 arrest [22.05]	0.002502	PKC1 RPN12 SPT6	3	28
Divalent cations and heavy metals sensitivity [62.35.02]	0.004346	CCR4 CSG2 UPC2 RPN12	4	68
Nitrogen utilization [42.30]	0.009844	AGP2	1	1
MIPS Subcellular Localization (48 categories)
Category	p-value	In Category from Cluster	k	f
neck [705.03]	0.0007624	PKC1 LRG1 BUD4 HSL1 GYL1 CAF120	6	112
golgi-ER transport vesicles [745.03]	0.002759	SLY1 GLO3 SEC28 YMD8	4	60
bud [705]	0.007075	PKC1 GYL1 CAF120 SRL1	4	78
plasma membrane [720]	0.009127	SIT1 MSB2 PTR2 GYL1 CHS1 PDR5	6	184
MIPS Protein Complexes (1142 categories)
Category	p-value	In Category from Cluster	k	f
Complex Number 151 [550.2.151]	0.004081	KSP1 CHS1	2	10
Complex Number 156 [550.2.156]	0.00694	SLA1 RPN12	2	13
Nuclear pore complex (NPC) [310]	0.00694	NUP2 NUP1	2	13
Complex Number 79, probably membrane biogenesis and traffic [550.1.79]	0.009225	GLO3 SEC28	2	15
Complex Number 169 [550.2.169]	0.009225	IMD2 HHO1	2	15
MIPS Protein Classes (149 categories)
Category	p-value	In Category from Cluster	k	f
TEA domain [201.31.51]	0.009844	TEC1	1	1
H1 [112.11]	0.009844	HHO1	1	1
PKC family [161.11.21]	0.009844	PKC1	1	1
SMART Domains (399 categories)
Category	p-value	In Category from Cluster	k	f
TBC	0.004081	GYP7 GYL1	2	10
S_TKc	0.006457	PKC1 KSS1 KIC1 HSL1	4	76
C1	0.009844	PKC1	1	1
TEA	0.009844	TEC1	1	1
Hr1	0.009844	PKC1	1	1
YqgFc	0.009844	SPT6	1	1
SH2	0.009844	SPT6	1	1
H15	0.009844	HHO1	1	1
LRR_TYP	0.009844	CCR4	1	1
PFam-A Domains (2369 categories)
Category	p-value	In Category from Cluster	k	f
Pkinase_Tyr	0.0006603	PKC1 KSS1 KSP1 KIC1 HAL5 HSL1	6	109
Pkinase	0.0006603	PKC1 KSS1 KSP1 KIC1 HAL5 HSL1	6	109
TBC	0.002572	GYP7 GYL1	2	8
PDR_CDR	0.002572	PDR15 PDR5	2	8
ABC2_membrane	0.004081	PDR15 PDR5	2	10
TEA	0.009844	TEC1	1	1
C1_1	0.009844	PKC1	1	1
HR1	0.009844	PKC1	1	1
SH2	0.009844	SPT6	1	1
Coatomer_E	0.009844	SEC28	1	1
DUF2416	0.009844	AIM19	1	1
DUF1709	0.009844	BUD4	1	1
PTR2	0.009844	PTR2	1	1
Shugoshin_N	0.009844	SGO1	1	1
Shugoshin_C	0.009844	SGO1	1	1
Nup_retrotrp_bd	0.009844	NUP1	1	1
SART-1	0.009844	SNU66	1	1
Linker_histone	0.009844	HHO1	1	1
FFD_TFG	0.009844	SCD6	1	1
SHD1	0.009844	SLA1	1	1
Yeast Two Hybrid - Uetz (509 categories)
Category	p-value	In Category from Cluster	k	f
Yeast Two Hybrid - Ito (core) (449 categories)
Category	p-value	In Category from Cluster	k	f
YLR026C (SED5)	0.009844	SLY1	1	1
YLR223C (IFH1)	0.009844	SRL1	1	1
YOR043W (WHI2)	0.009844	PSR2	1	1
YOR353C (SOG2)	0.009844	KIC1	1	1
YEL048C	0.009844	KSS1	1	1
Yeast Two Hybrid - Ito (full) (1532 categories)
Category	p-value	In Category from Cluster	k	f
YDL159W (STE7)	0.009844	KSS1	1	1
YDR268W (MSW1)	0.009844	SNU66	1	1
YHR148W (IMP3)	0.009844	GLO3	1	1
YLR223C (IFH1)	0.009844	SRL1	1	1
YLR304C (ACO1)	0.009844	CHS1	1	1
YNL244C (SUI1)	0.009844	MTC5	1	1
YOR353C (SOG2)	0.009844	KIC1	1	1
YBR250W	0.009844	YMD8	1	1
Synthetic Genetic Array Analysis (8 categories)
Category	p-value	In Category from Cluster	k	f
MDS Proteomics Complexes (493 categories)
Category	p-value	In Category from Cluster	k	f
YOR353C (SOG2)	0.009844	KIC1	1	1
YML016C (PPZ1)	0.009844	SNU66	1	1
Cellzome Complexes (459 categories)
Category	p-value	In Category from Cluster	k	f
Proteome Localization--Observed (11 categories)
Category	p-value	In Category from Cluster	k	f
Proteome Localization--Predicted+Observed (4 categories)
Category	p-value	In Category from Cluster	k	f
nuc	0.0035	CCR4 SLA1 TEC1 ASF2 LRG1 PEX5 SUM1 PDR15 RPN12 VID30 KSS1 SPT6 KIC1 SKN7 IML1 HSL1 RSC4 IRC20 NUP2 SGO1 NUP1 AZF1 SNU66 HHO1	24	1432
Deletions Consortium (Essentiality, Morphology) (11 categories)
Category	p-value	In Category from Cluster	k	f
Yeast Fitness Data (1 category)
Category	p-value	In Category from Cluster	k	f
Published Complexes (7 categories)
Category	p-value	In Category from Cluster	k	f
